# Supplementary material for: Discovery of BAY-390, a Selective CNS Penetrant Chemical Probe as Transient Receptor Potential Ankyrin 1 (TRPA1) Antagonist
Source: PubMed Central journal article supplement — J Med Chem. 2023 Jan 9;66(2):1583–600. doi: 10.1021/acs.jmedchem.2c01830 (PMC9884088; doi:10.1021/acs.jmedchem.2c01830), 2023-01-09
Supplement: jm2c01830_si_001.pdf [file jm2c01830_si_001.pdf]

## Supporting information

Discovery of BAY-390, a selective CNS penetrant chemical probe as  
Transient receptor potential ankyrin 1 (TRPA1) antagonist

*Stefanie Mesch<sup>[a]</sup>, Daryl Walter<sup>[b]</sup>, Alexis Laux-Biehlmann<sup>[c]</sup>, Daniel Basting<sup>[d]</sup>, Stuart Flanagan<sup>[b]</sup>, Hideki Miyatake Onozaba<sup>[a]</sup>, Stefan Bäurle<sup>[a]</sup>, Christopher Pearson<sup>[b]</sup>, James Jenkins<sup>[b]</sup>, Philip Elves<sup>[b]</sup>, Stephen Hess<sup>[e]</sup>, Anne-Marie Coelho<sup>[f]</sup>, Andrea Rotger<sup>[g]</sup>, Ulrich Bothe<sup>[a]</sup>, Schanila Nawaz<sup>[f]</sup>, Thomas M. Zollner<sup>[h]</sup>, Andreas Steinmeyer<sup>[a]</sup>.*

*[a] Bayer AG, Pharmaceutical R&D, Drug Discovery, Medicinal Chemistry, Bayer AG, Müllerstr. 178, 13353 Berlin, Germany*

*[b] Discovery Chemistry, Evotec UK, 114 Innovation Drive, Milton Park, Abingdon, Oxfordshire OX14 4RZ, UK8*

*[c] Research & Development, Pulmonary Drug Discovery Laboratory, Bayer US LLC, Boston, MA, USA.*

*[d] Bayer AG, Pharmaceutical R&D, Drug Discovery, Lead identification and characterization, Bayer AG, Aprather Weg 18a, 42113, Wuppertal, Germany*

*[e] In Vitro Pharmacology, Manfred Eigen Campus, Evotec SE, Essener Bogen 7, 22419 Hamburg, Germany.*

*[f] In Vivo Pharmacology, Manfred Eigen Campus, Evotec SE, Essener Bogen 7, 22419 Hamburg, Germany.*

*[g] Bayer AG, Pharmaceutical R&D, Early Development, Drug Metabolism and Pharmacokinetics, Müllerstr. 178, 13353 Berlin, Germany. Present address: Preclinical Compound Profiling, Nuvisan ICB GmbH, Müllerstr. 178, 13353 Berlin, Germany.*

*[h] Bayer AG, Pharmaceutical R&D, Preclinical Research, Therapeutic Area Endocrinology, Metabolism and Reproductive Health, Bayer AG, Müllerstr. 178, 13353 Berlin, Germany*

**Corresponding Author:**

Hideki Miyatake Ondozabal – Bayer AG, 13353 Berlin, Germany.

Email: [hideki.miyatakeondozaal@bayer.com](mailto:hideki.miyatakeondozaal@bayer.com)

**Table of Contents**

**Analysis**

**S3:** Analytical LC-MS methods

**S4:** Chiral separation methods and Preparative HPLC methods

**S7:** LC-MS traces for key compounds **16-18, 34h**

**S9:** <sup>1</sup>H-NMR and <sup>13</sup>C-NMR spectra of compound **18**

**S10:** <sup>1</sup>H-NMR spectra of compound **16, 24a-24h, 17, 27a-27h, 31, 32a-32f, 33, and 34a-34i**

**S28:** Vibrational circular dichroism measurements of compound **18**

**S29:** Off-target selectivity data (Eurofins-Panlabs radioligand binding assay) of compound **18**

**Pharmacology**

**S32:** Determination of brain/plasma ratio and measured plasma exposure levels in rat using compound **18 (BAY-390)**

**S33:** Estimation of plasma protein binding by equilibrium dialysis

**S33:** Brain/plasma ratio determination

**Synthesis**

**S34:** Characterization and synthesis of intermediates **22b-i, 23b-i and 26b-i**

## **Analysis**

### **Analytical LCMS methods**

**Method A:** Instrument Waters Acquity UPLCMS SingleQuad; Column: Phenomenex Kinetix-XB C18 2.1 x 100mm, 1.7 $\mu$ m; eluent A: water + 0.1 vol % formic acid, eluent B: acetonitrile + 0.1 vol % formic acid; gradient: 0-5.3 min 5-100% B, 5.3-5.8 min 100% B; flow 0.6 ml/min; temperature: 40 °C; PDA scan: 210-420 nm.

**Method B:** Instrument Agilent G1312A with Waters PDA detector and Qtof-micro mass spectrometer or Shimadzu LCMS - LC 20-AB - LCMS 2010 MS detector; Column: Waters Atlantis dC18 2.1 x 100mm, 3 $\mu$ m; eluent A: water + 0.1 vol % formic acid, eluent B:

acetonitrile + 0.1 vol % formic acid; gradient: 0-5.0 min 5-100% B, 5.0-5.4 min 100% B; flow 0.6 ml/min; temperature: 40 °C; PDA scan: 210-420 nm.

**Method C:** Instrument Agilent G1312A with Waters PDA detector and ZQ mass spectrometer or Shimadzu LCMS - LC 20-AB - LCMS 2010 MS detector; Column: Kinetex Core-Shell C18, 2.1 x 50mm, 5µm; eluent A: water + 0.1 vol % formic acid, eluent B: acetonitrile + 0.1 vol % formic acid; gradient: 0-1.2 min 5-100% B, 1.2-1.3 min 100% B; flow 1.2 ml/min; temperature: 40 °C; PDA scan: 210-420 nm.

**Method D:**

Instrument: Waters Acquity UPLCMS SingleQuad; column: Acquity UPLC BEH C18 1.7 µm, 50 x 2.1mm; Eluent A: Water + 0.2 Vol-% aq. NH<sub>3</sub> (32%), Eluent B: Acetonitrile; Gradient: 0-1.6 min 1-99% B, 1.6-2.0 min 99% B; flow 0.8 ml/min; Temperature: 60 °C; DAD scan: 210-400 nm

**Method E:**

Instrument: Waters Acquity UPLC-MS SQD 3001; Column: Acquity UPLC BEH C18 1.7 µm, 50x2.1 mm; Eluent A: water + 0.2 vol % ammonia, Eluent B: acetonitrile; Gradient: 0-1.6 min 1-99% B, 1.6-2.0 min 99% B; Flow rate: 0.8 mL/min; Temperature: 60 °C; Injection: 2 µL; DAD scan: 210-400 nm; ELSD.

**Method F:**

Instrument: Waters Acquity UPLC-MS SQD 3001; Column: Acquity UPLC BEH C18 1.7 µm, 50x2.1 mm; Eluent A: water + 0.1 vol % formic acid , Eluent B: acetonitrile; Gradient: 0-1.6 min 1-99% B, 1.6-2.0 min 99% B; Flow rate: 0.8 mL/min; Temperature: 60 °C; Injection: 2 µL; DAD scan: 210-400 nm.

### **Method G: TOF/6500**

Instrument: Agilent 1290 UPLCMS 6230 TOF; column: BEH C 18 1.7  $\mu\text{m}$ , 50x2.1mm;  
Eluent A: water + 0.05 % formic acid (99%); Eluent B: acetonitrile + 0.05 % formic acid (99%); gradient: 0-1.7 2-90% B, 1.7-2.0 90% B; flow 1.2 ml/min; temperature: 60°C; DAD scan: 190-400 nm.

### **Chiral separation methods and Preparative HPLC methods**

#### **Method SFC (Evo):**

Instrument: Agilent: 1260, Aurora SFC-Module; column: Chiralpak IA 5 $\mu\text{m}$  100x4.6mm;  
Eluent A: CO<sub>2</sub>, Eluent B: Ethanol; Isocratic: 5%B; flow 4.0 ml/min; Temperature: 37.5°C;  
BPR: 100bar; UV 254 nm

#### **Method SFC:**

Instrument: Agilent: 1260, Aurora SFC-Module; column: Chiralpak IG 5 $\mu\text{m}$  100x4.6mm;  
Eluent A: CO<sub>2</sub>, Eluent B: Ethanol; Isocratic: 15%B; flow 4.0 ml/min; Temperature: 37.5°C;  
BPR: 100bar; MWD @ 254nm preparative Instrument: Sepiatec: Prep SFC100; column:  
Chiralpak IG 5 $\mu\text{m}$  250x30mm; Eluent A: CO<sub>2</sub>, Eluent B: Ethanol; Isocratic: 15%B; flow  
100.0 ml/min Temperature: 40°C; BPR: 150bar; UV 254 nm

#### **Method N1:**

Instrument: Amy-C column: 4.6mm x 250mm, 5 $\mu$ m; Eluent A: MeOH; Eluent B: CO<sub>2</sub>;

Isocratic: 20%A+80%B; flow 4 ml/min; Temperature: 40 °C; UV 210-400 nm.

**Preparative:** Instrument: Amy-C column: 20mm x 250mm, 5 $\mu$ m; Eluent A: MeOH; Eluent B:

CO<sub>2</sub>; Isocratic: 20%A+80%B; flow 50 ml/min; Temperature: 40 °C; UV 210 nm.

### **Method POB:**

Instrument: Agilent HPLC 1260; column: Chiralpak IG 3 $\mu$  100x4,6mm; Eluent A:

Acetonitrile + 0.1 Vol-% Diethylamine (99%); Eluent B: Ethanol; Isocratic: 90%A+10%B;

flow 1.4 ml/min; Temperature: 25 °C; DAD 254 nm; **preparative** Instrument: Labomatic

HD5000, Labocord-5000; Gilson GX-241, Labcol Vario 4000, column: Chiralpak IG 5 $\mu$

250x30mm; Eluent A: Acetonitrile + 0.1 Vol-% Diethylamine (99%); Eluent B: Ethanol;

Isocratic: 90%A+10%B; flow 50.0 ml/min; UV 254 nm

### **Method SFCB:**

Instrument: Agilent: 1260, Aurora SFC-Modul; column: Chiralpak IF 5 $\mu$ m 100x4.6mm;

Eluent A: CO<sub>2</sub>, Eluent B: Methanol + 0.2 Vol-% aq. NH<sub>3</sub> (32%); Isocratic: 8%B; flow 4.0

ml/min; Temperature: 37.5°C; BPR: 100bar; MWD @ 254nm; **preparative** Instrument:

Sepiatec: Prep SFC100; column: Chiralpak IF 5 $\mu$ m 250x20mm; Eluent A CO<sub>2</sub>, Eluent B:

Methanol + 0.2 Vol-% aq. NH<sub>3</sub> (32%); Isocratic: 8%B; flow 100.0 ml/min Temperature: 40°C; BPR: 150bar; UV 254 nm

#### **Method NP:**

Instrument: Agilent HPLC 1260; column: Chiralpak IG 3 $\mu$  100x4,6mm; Eluent A: Hexane; Eluent B: Ethanol; Isocratic: 95%A+5%B; flow 1.4 ml/min; Temperature: 25 °C; DAD 220 nm; preparative Instrument: Labomatic HD5000, Labocord-5000; Gilson GX-241, Labcol Vario 4000, column: Chiralpak IG 5 $\mu$  250x30mm; Eluent A: Hexane; Eluent B: Ethanol; Isocratic: 95%A+5%B; flow 40.0 ml/min; UV 220 nm

#### **Method NP2:**

Instrument: Agilent: 1260, Aurora SFC-Module; column: Chiralpak IF 5 $\mu$ m 100x4.6mm; Eluent A: CO<sub>2</sub>, Eluent B: Methanol; isocratic: 5%B; flow 4.0 ml/min; Temperature: 37.5°C; BPR: 100bar; UV 254 nm; preparative Instrument: Sepiatec: Prep SFC100; column: Chiralpak IF 5 $\mu$ m 250x30mm; Eluent A: CO<sub>2</sub>, Eluent B: Methanol; isocratic: 5%B; flow 100.0 ml/min Temperature: 40°C; BPR: 150bar; UV 254 nm

#### **Method NP3:**

Instrument: Waters Acquity UPLCMS SingleQuad; column: Acquity UPLC BEH C18 1.7  $\mu\text{m}$ , 50x2.1mm; Eluent A: water + 0.1 Vol-% formic acid (99%), Eluent B: Acetonitrile; Gradient: 0-1.6 min 1-99% B, 1.6-2.0 min 99% B; flow 0.8 ml/min; Temperature: 60°C; DAD scan: 210-400nm; **preparative** Instrument: Waters Autopurificationsystem; column: Waters XBrigde C18 5 $\mu$  100x30mm; Eluent A: water + 0.1 Vol-% formic acid (99%), Eluent B: Acetonitrile; Gradient: 0.00–0.50 min 20% B (40->70mL/min), 0.51–5.50 min 40-60% B (70mL/min), DAD scan: 210-400 nm

#### **Method H (basic)**

Instrument: pump: Labomatic HD-5000 or HD-3000, head HDK 280, lowpressure gradient module ND-B1000; manual injection valve: Rheodyne 3725i038; detector: Knauer Azura UVD 2.15; collector: Labomatic Labocol Vario-4000; column: Chromatorex RP C-18 10  $\mu\text{m}$ , 125x30mm; eluent A: water + 0.2 vol-% ammonia (32%), eluent B: acetonitrile;



LC-MS traces for key compounds 16-18, 34h (Anti-probe)

Figure S1. LC-MS trace of compound 16

No mass ion detected.

### LC Chromatogram

LC#6 : ELS Detector

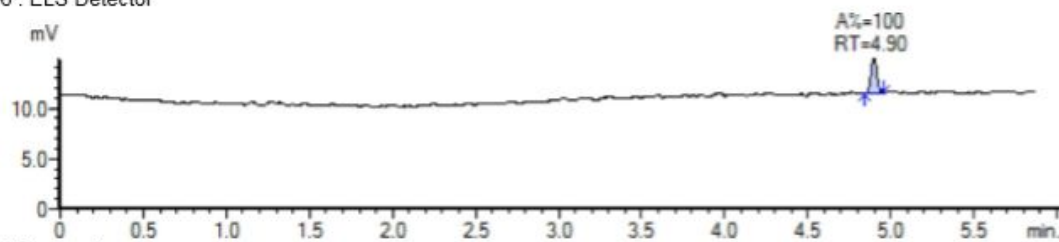

### MS Chromatogram

Group#1 Scan(+) ESI : TIC

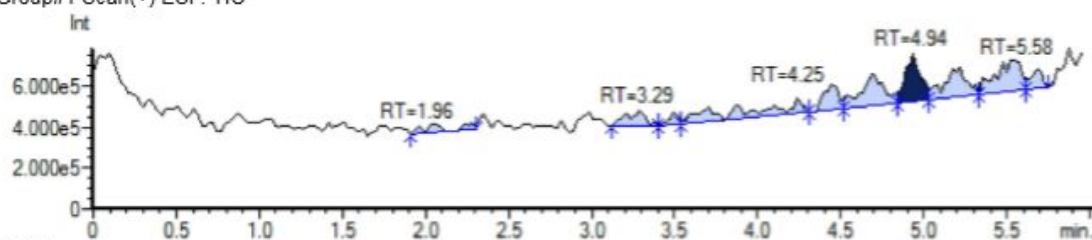

### MS Spectrum

Group#1 - PDA Peak: 16, RT: 4.90 to 5.02 min

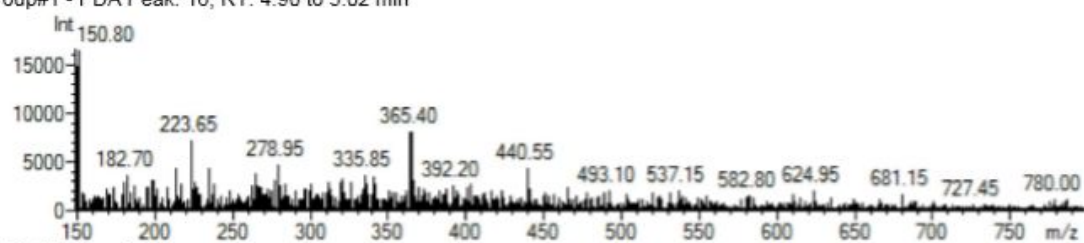

### PDA Chromatogram

1: Wavelength 215 nm, Band Width 4 nm

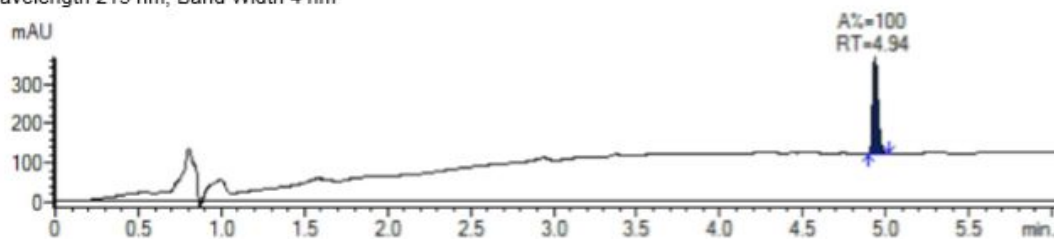

Figure S2. LC-MS trace of compound 17

Sample 1 Vial 1:31 ID EVME1455\_2\_2 File EVME1455\_2\_2 Date 01-Nov-2016 Time 14:10:00 Description

3: UV Detector: TIC Smooth (Mn, 2x1)

2.834e+1  
Range: 2.894e+1

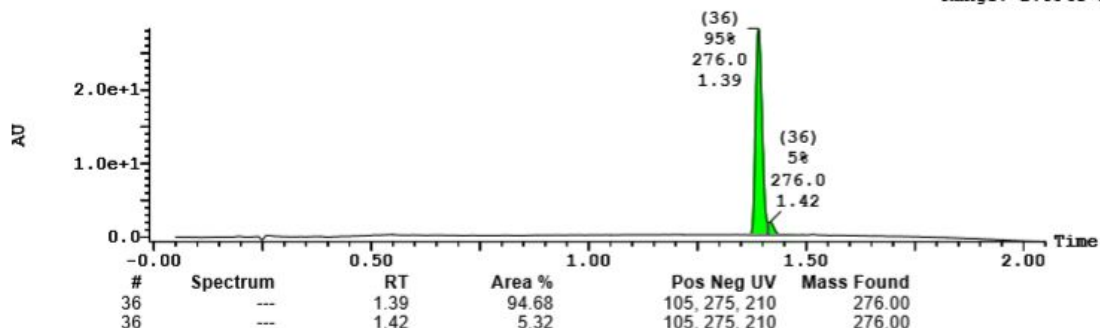

3: UV Detector: 220 Smooth (Mn, 2x1)

2.131e-1  
Range: 2.149e-1

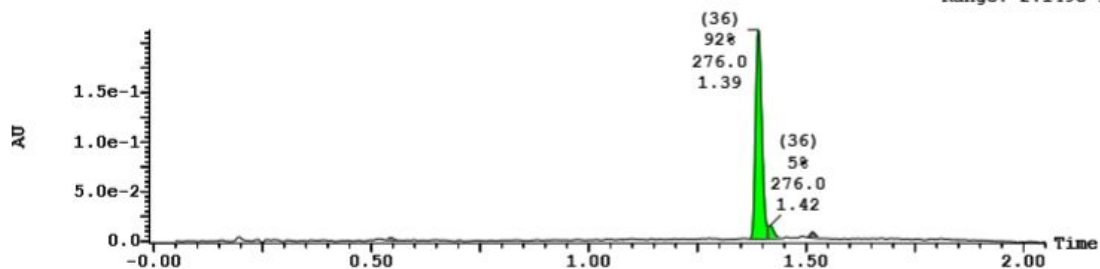

Figure S3. LC-MS trace of compound 18

Sample 1 Vial 1:30 ID EVME1645\_1\_1\_bas File EVME1645\_1\_1\_bas Date 30-Nov-2016 Time 13:31:57 Description

3: UV Detector: TIC Smooth (Mn, 2x1)

1.939e+2  
Range: 1.947e+2

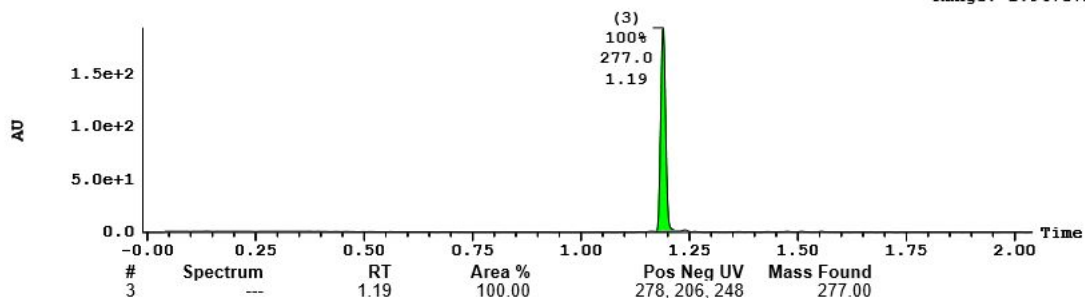

3: UV Detector: 220 Smooth (Mn, 2x1)

2.035  
Range: 2.038

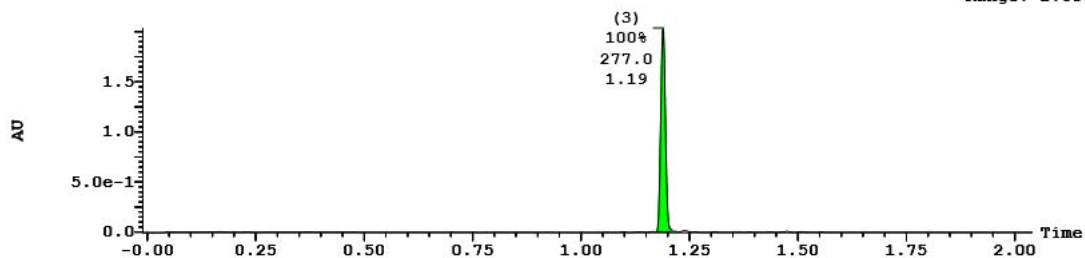

Figure S4. LC-MS trace of compound 34h

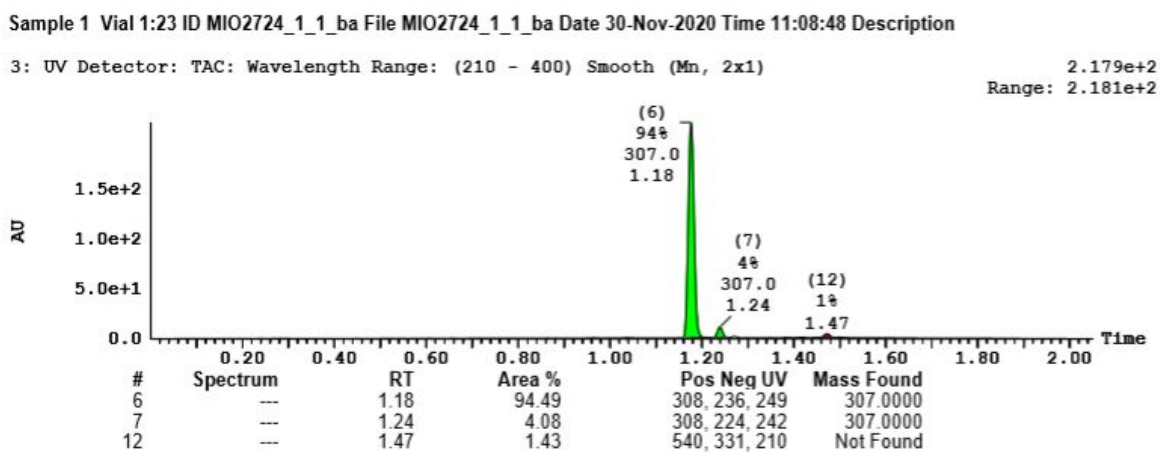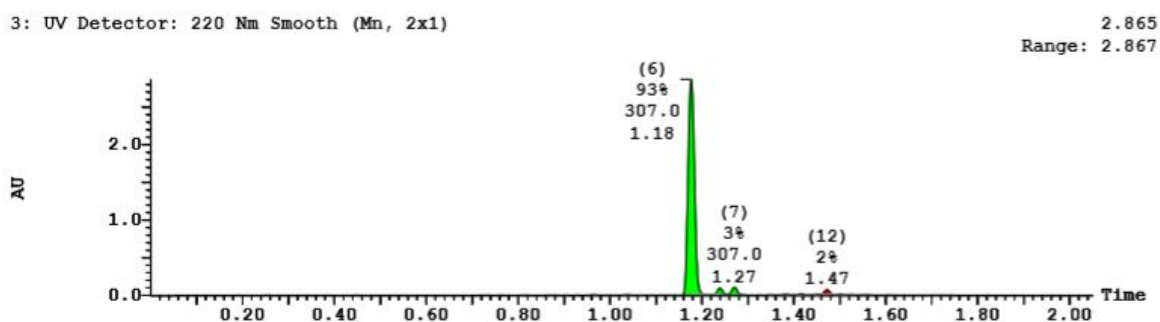

$^1\text{H-NMR}$  and  $^{13}\text{C-NMR}$  spectra of compound 18

Figure S5.  $^1\text{H-NMR}$  spectrum of compound 18

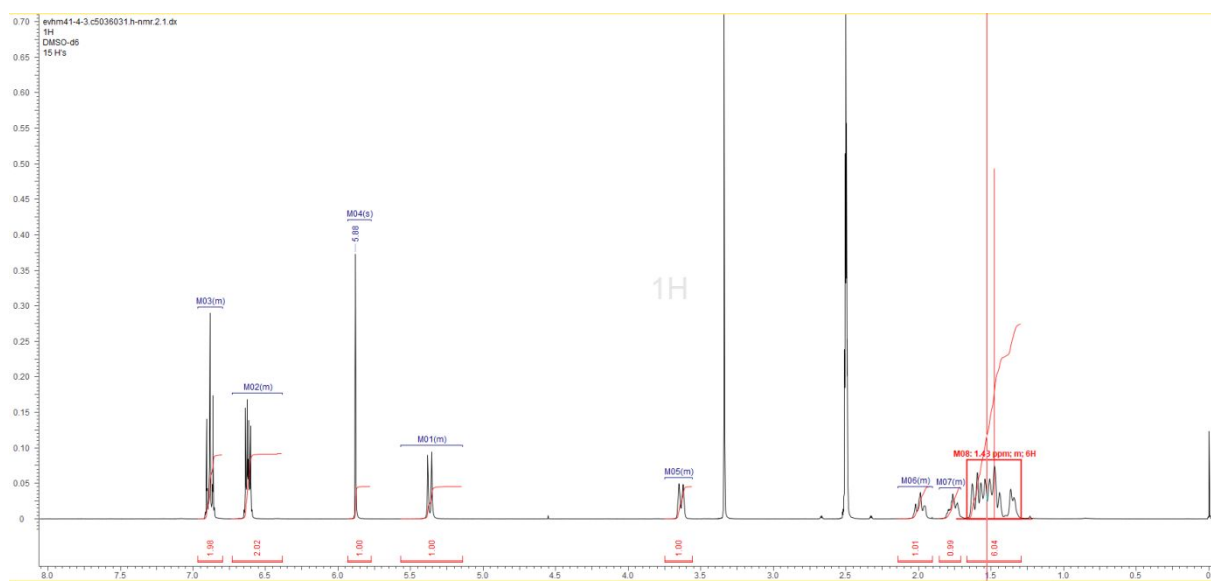

Figure S6.  $^{13}\text{C}$ -NMR spectrum of compound 18

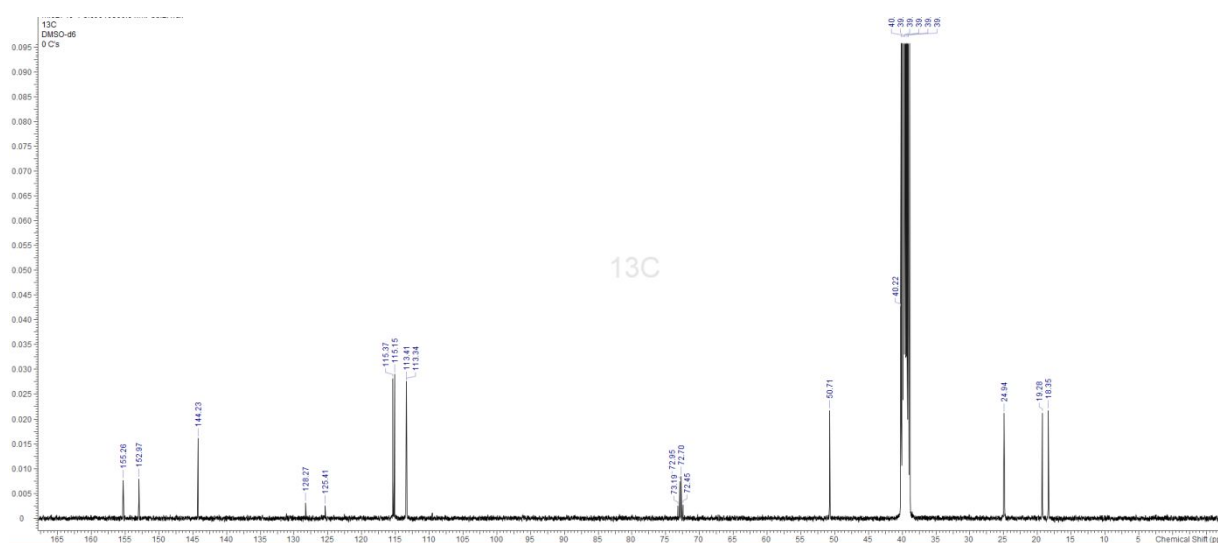

$^1\text{H}$ -NMR spectra of compound 16, 24a-24h, 17, 27a-27h, 31, 32a-32f, 33, and 34a-34i

Figure S7.  $^1\text{H}$ -NMR spectrum of compound 16

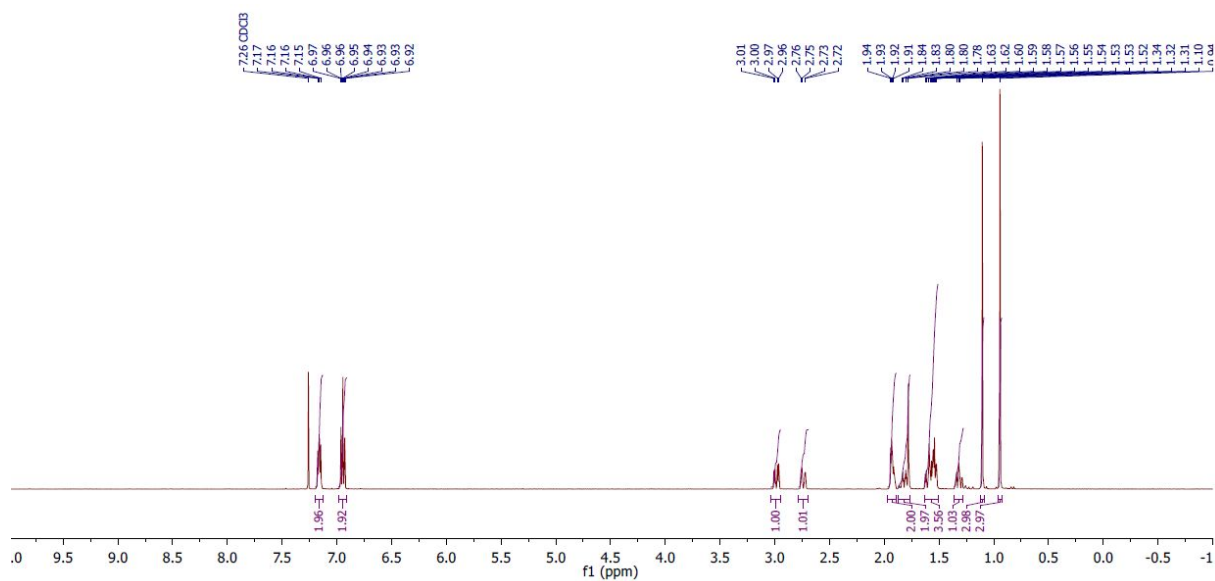

Figure S8. <sup>1</sup>H-NMR spectrum of compound 24a

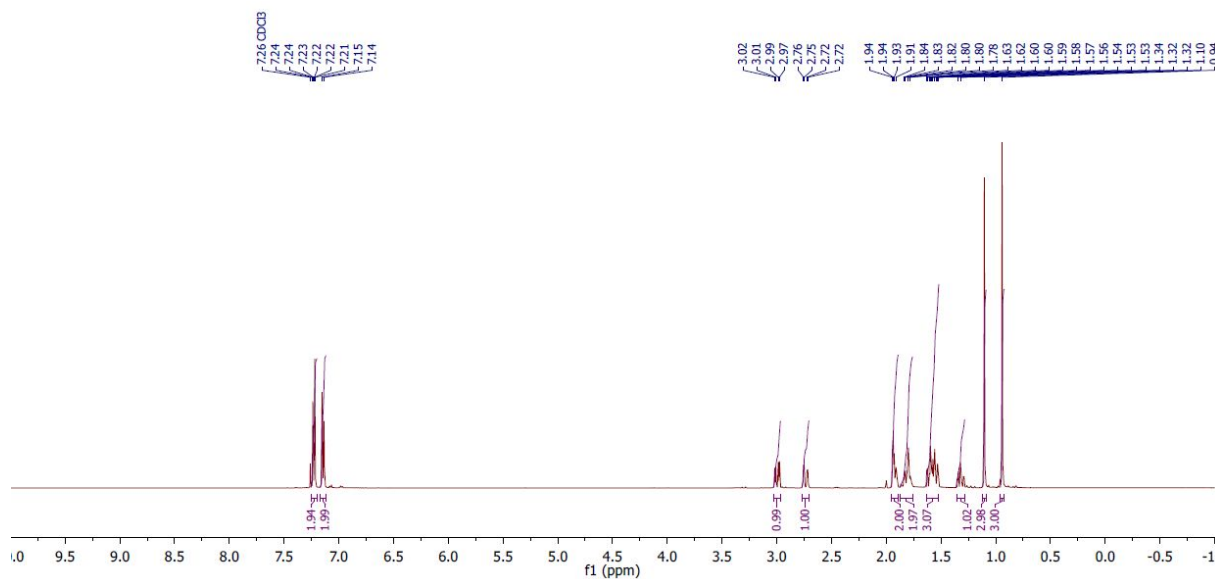

Figure S9. <sup>1</sup>H-NMR spectrum of compound 24b

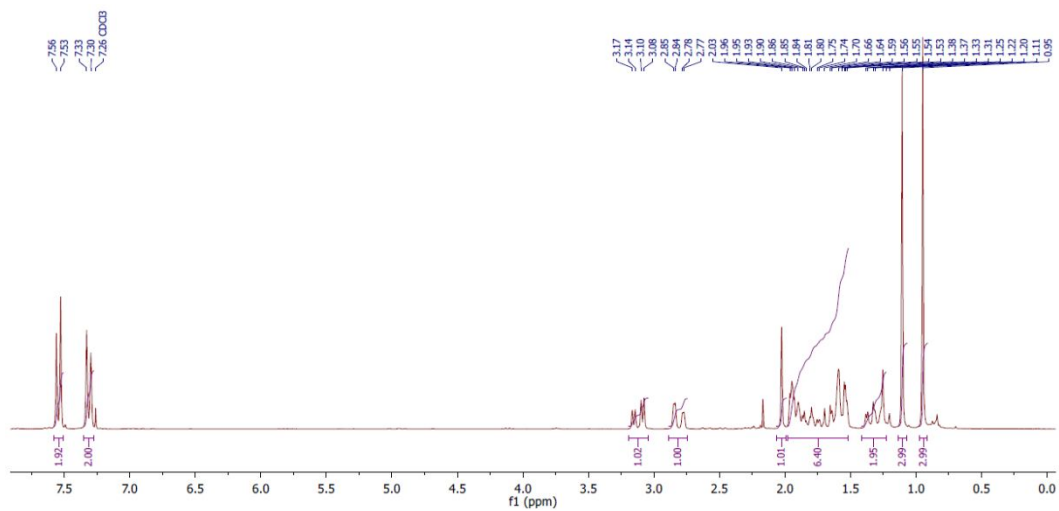

Figure S10. <sup>1</sup>H-NMR spectrum of compound 24c

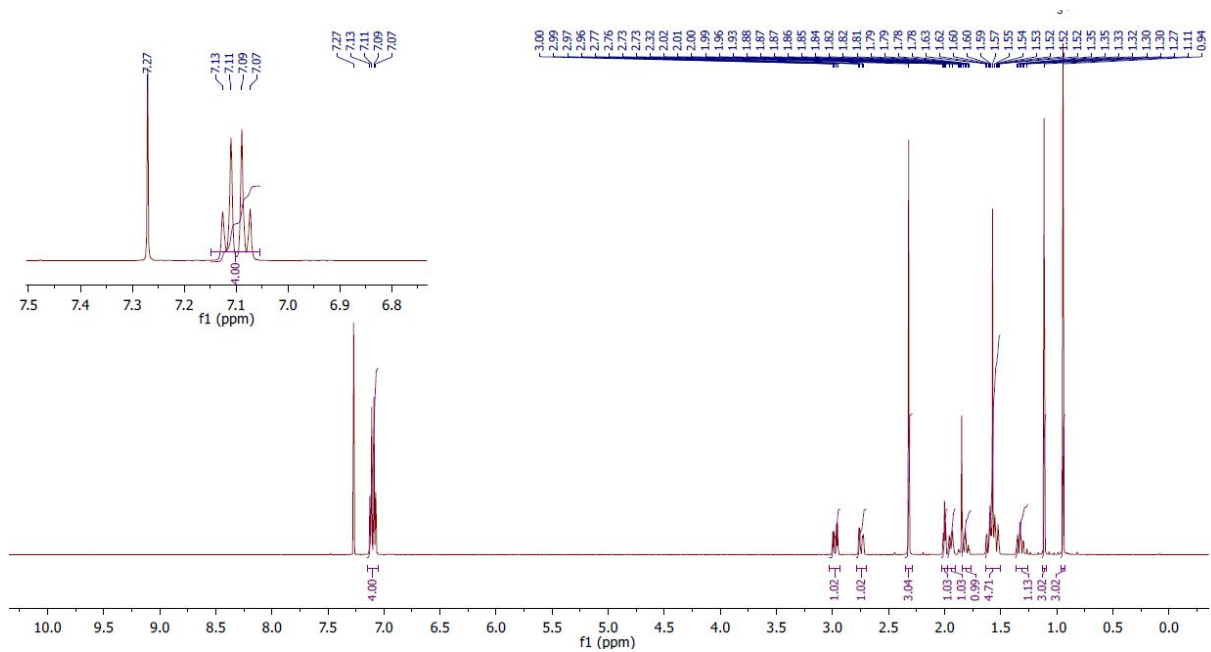

Figure S11.  $^1\text{H-NMR}$  spectrum of compound 24d

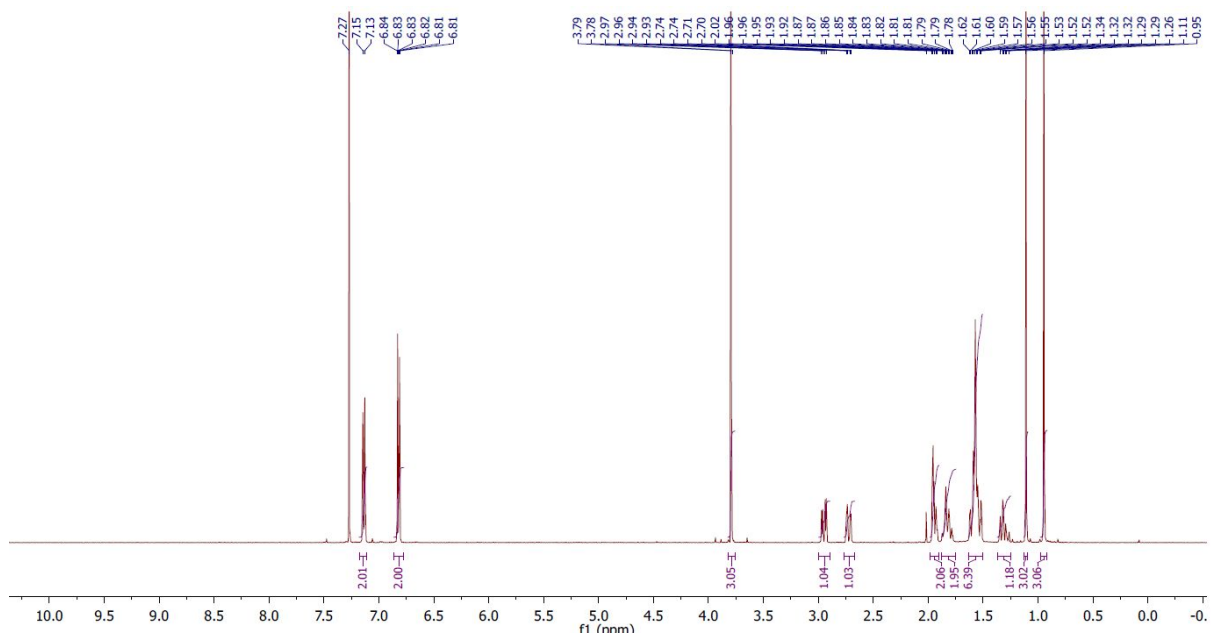



Figure S12. <sup>1</sup>H-NMR spectrum of compound 24e

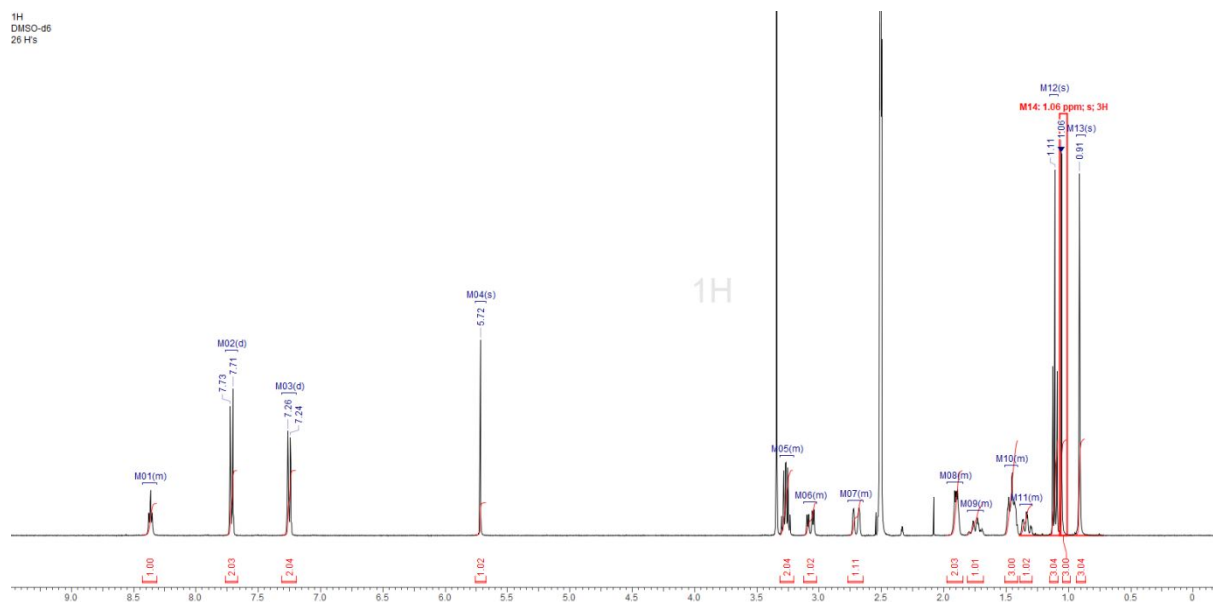

Figure S12. <sup>1</sup>H-NMR spectrum of compound 24f

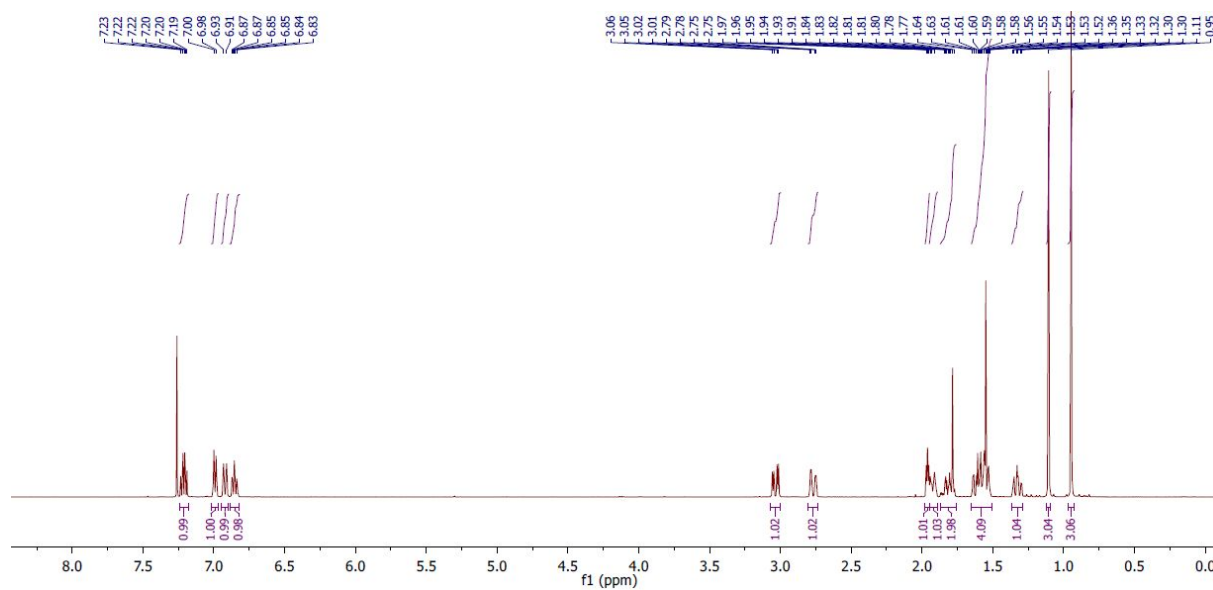

Figure S13.  $^1\text{H-NMR}$  spectrum of compound 24g

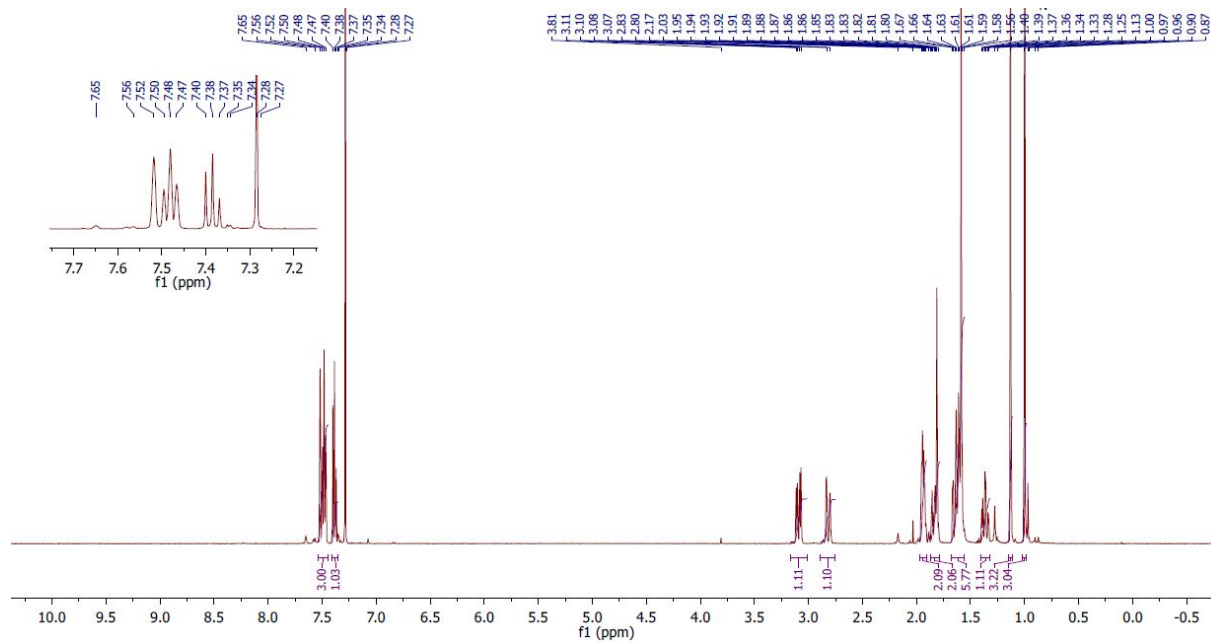

Figure S14.  $^1\text{H-NMR}$  spectrum of compound 24h

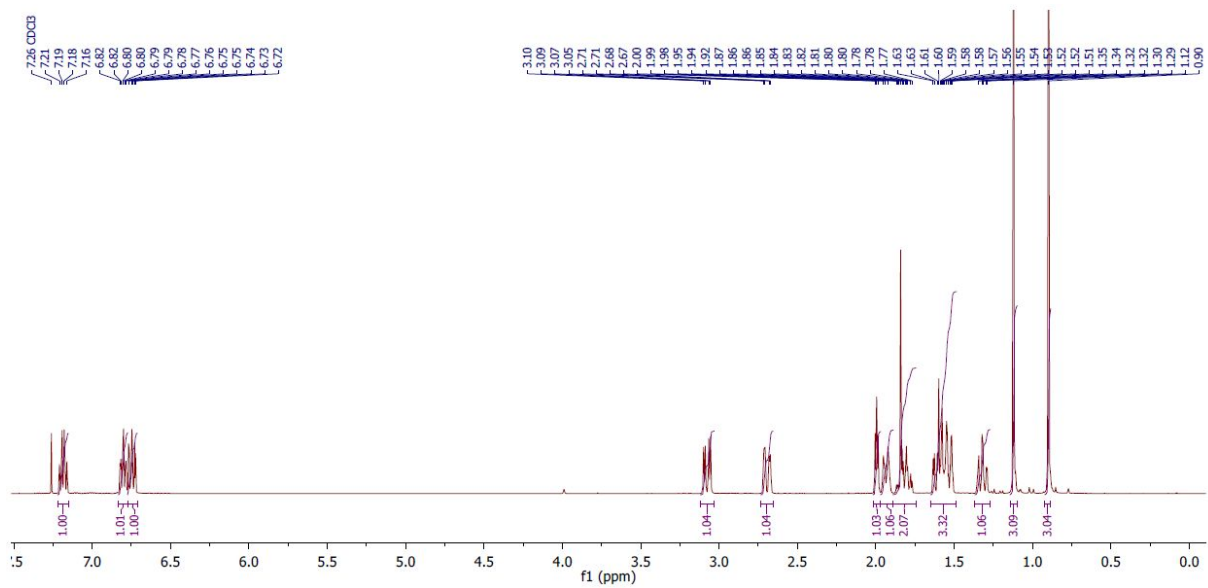

Figure S15.  $^1\text{H-NMR}$  spectrum of compound 17

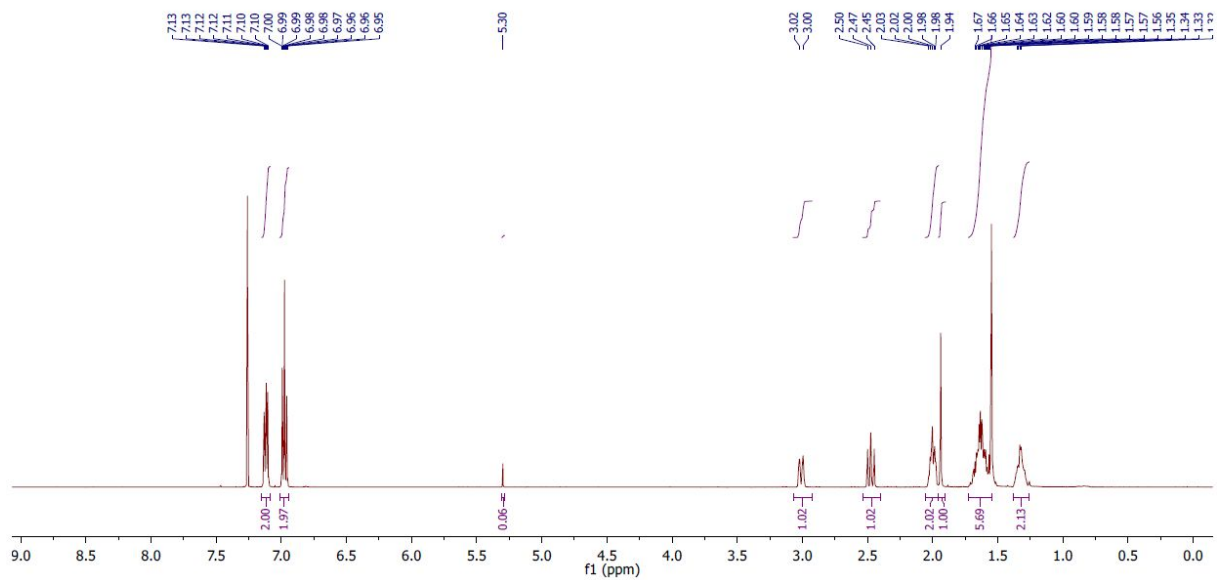

Figure S16. <sup>1</sup>H-NMR spectrum of compound 27a

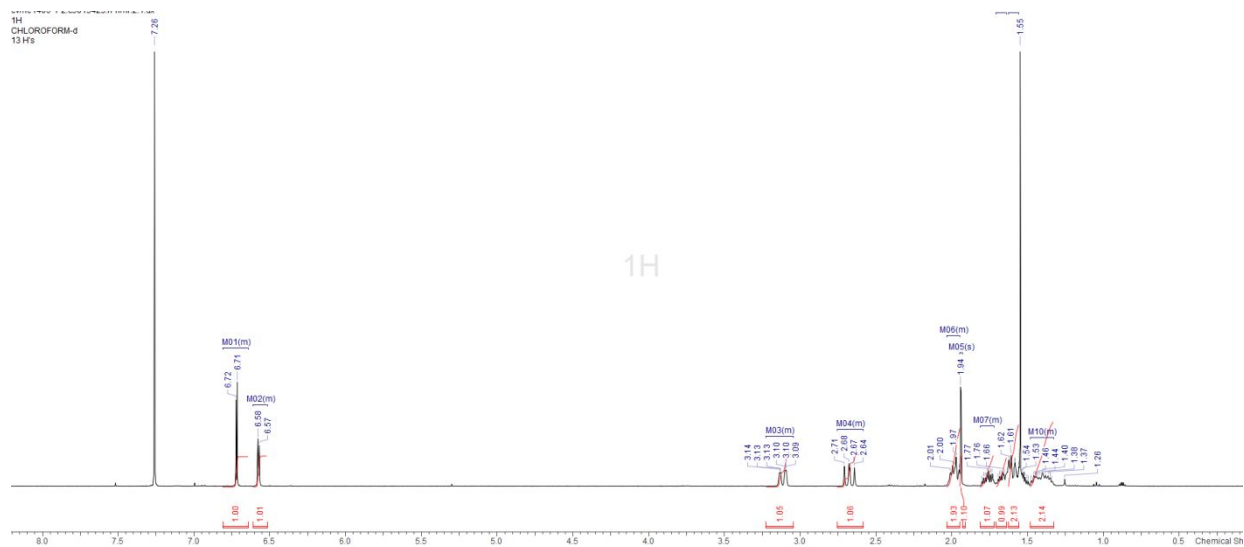

Figure S17. <sup>1</sup>H-NMR spectrum of compound 27b

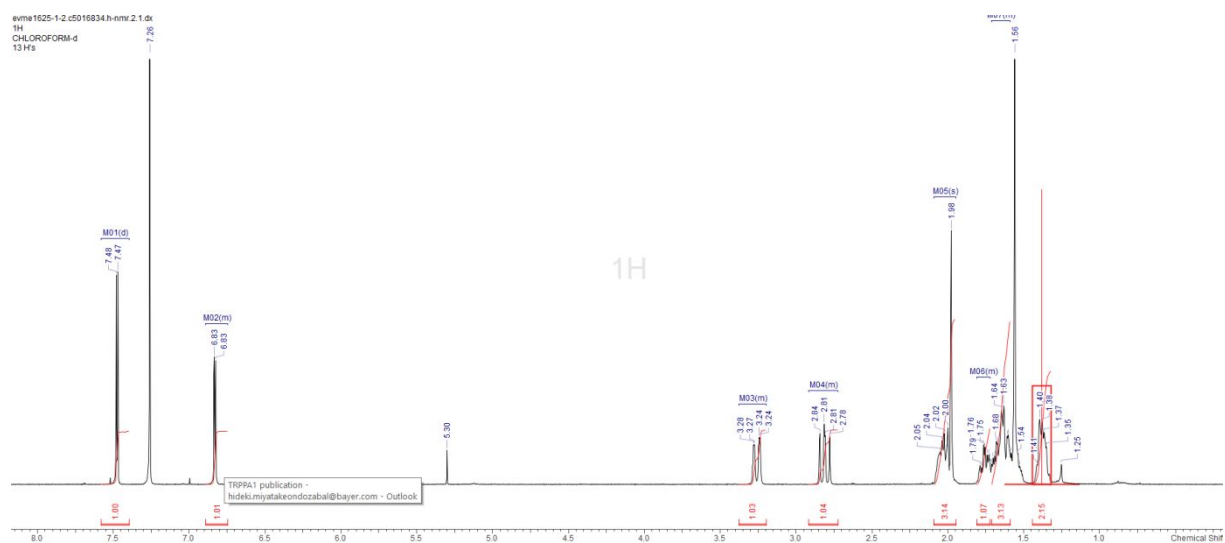

Figure S18. <sup>1</sup>H-NMR spectrum of compound 27c

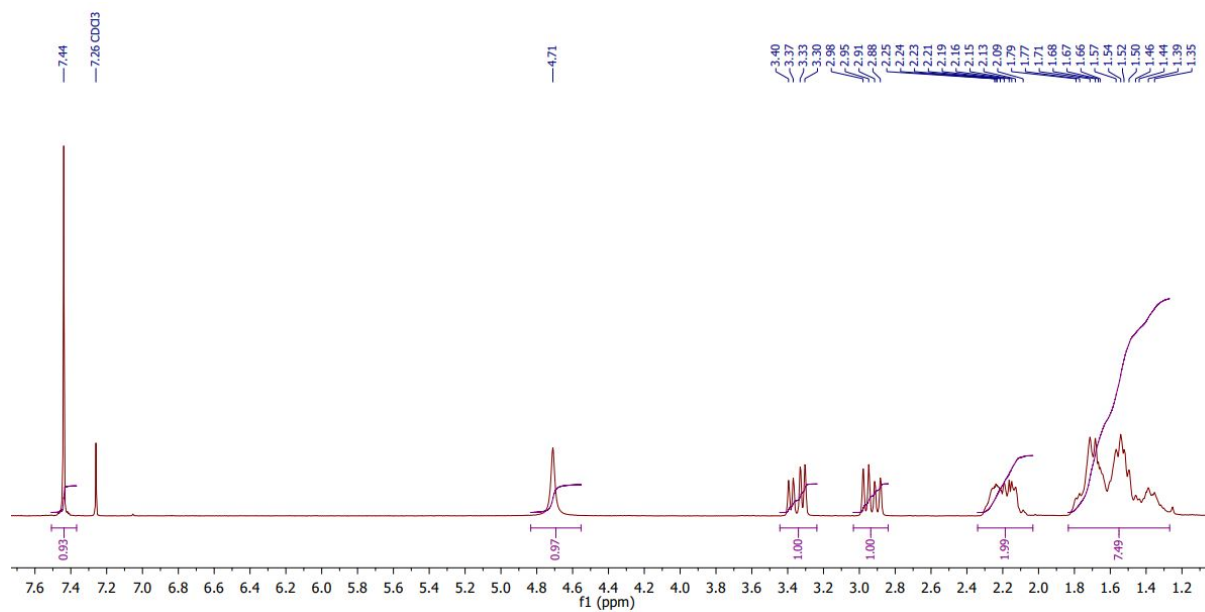

Figure S19. <sup>1</sup>H-NMR spectrum of compound 27d

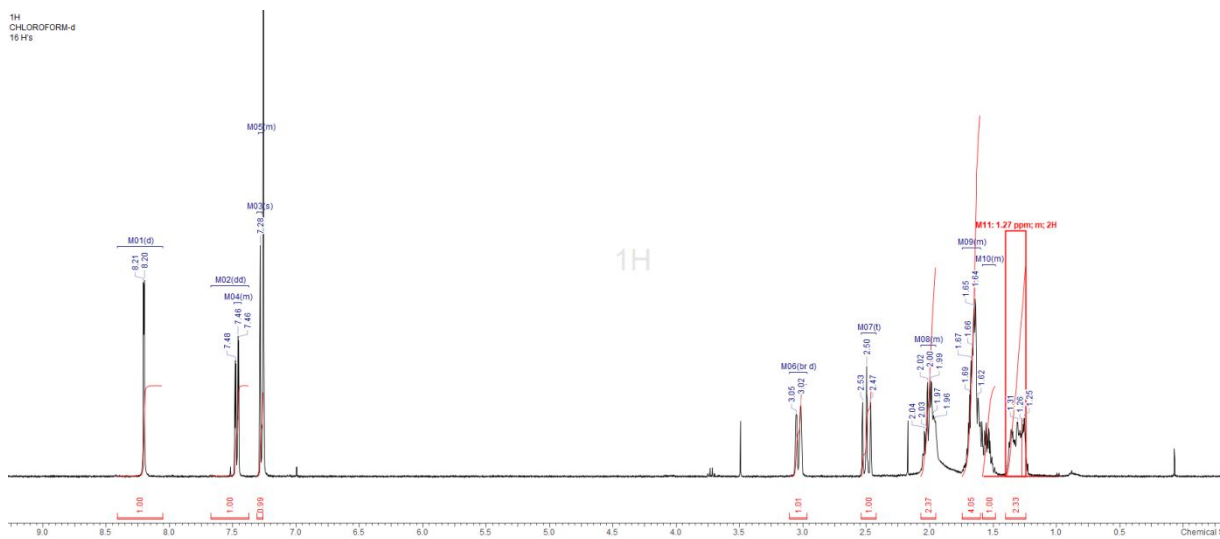

Figure S20. <sup>1</sup>H-NMR spectrum of compound 27e

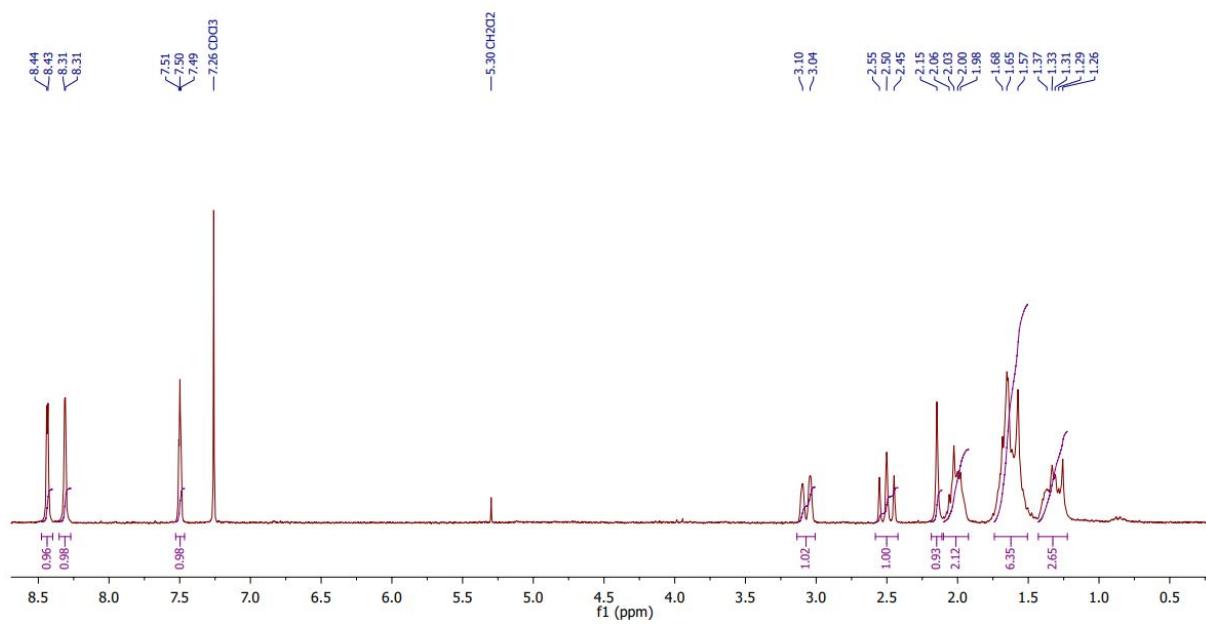

Figure S21. <sup>1</sup>H-NMR spectrum of compound 27f

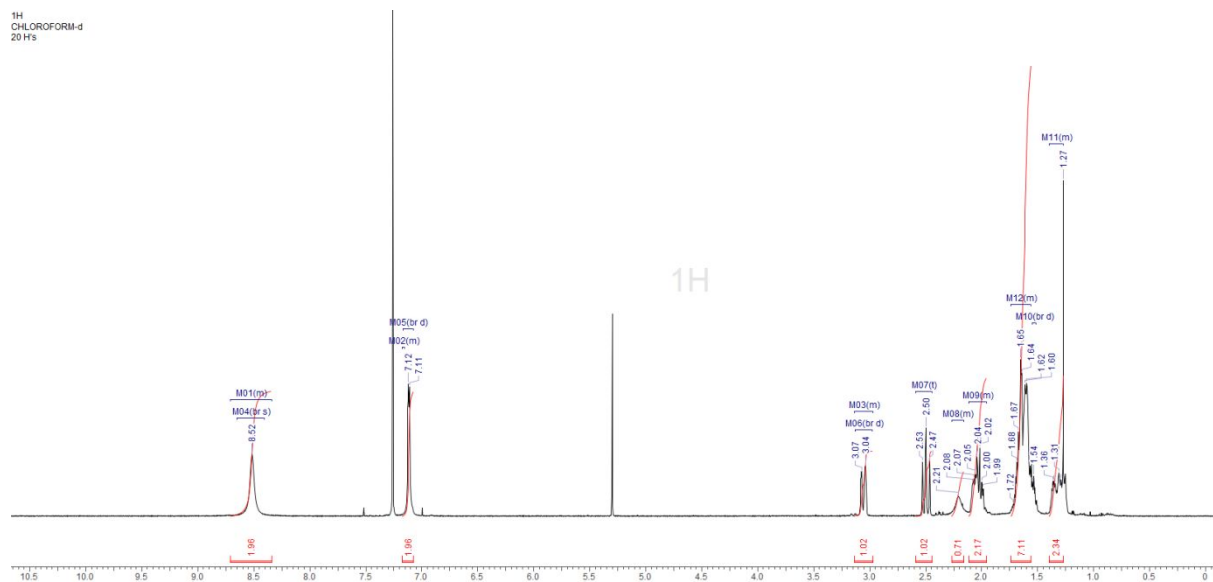

Figure S22. <sup>1</sup>H-NMR spectrum of compound 27g

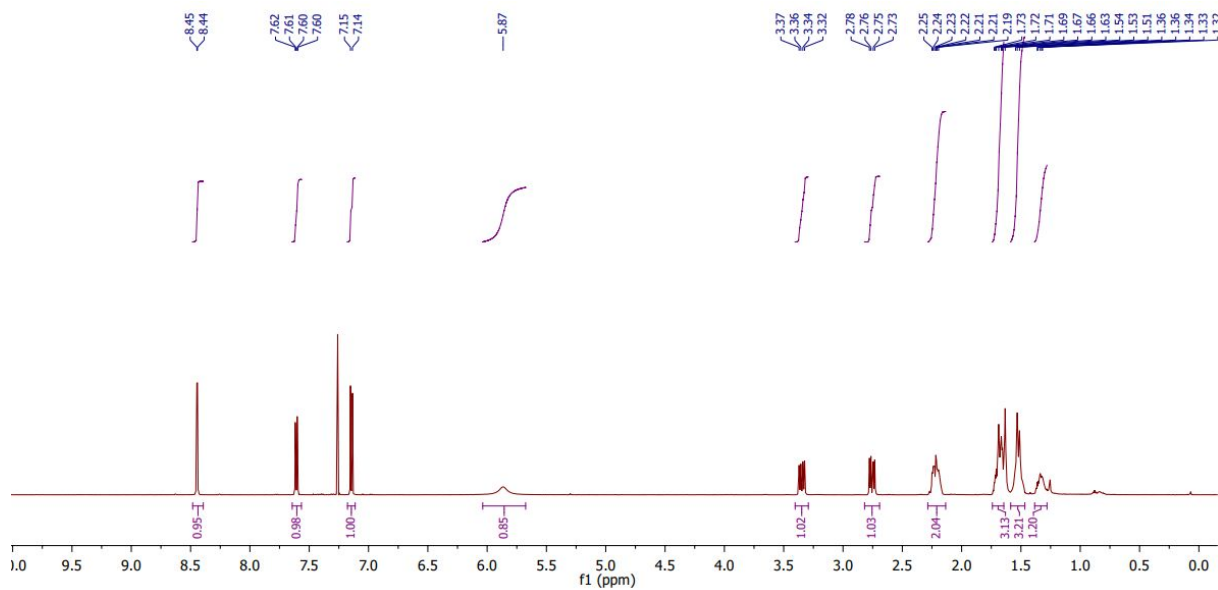

Figure S23. <sup>1</sup>H-NMR spectrum of compound 27h

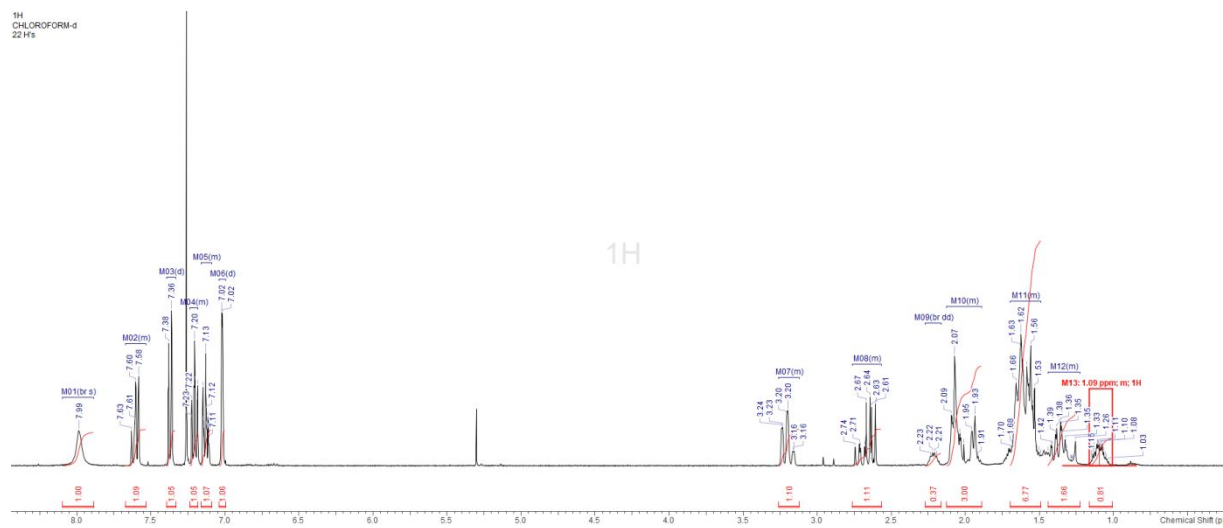



Figure S24. <sup>1</sup>H-NMR spectrum of compound 31

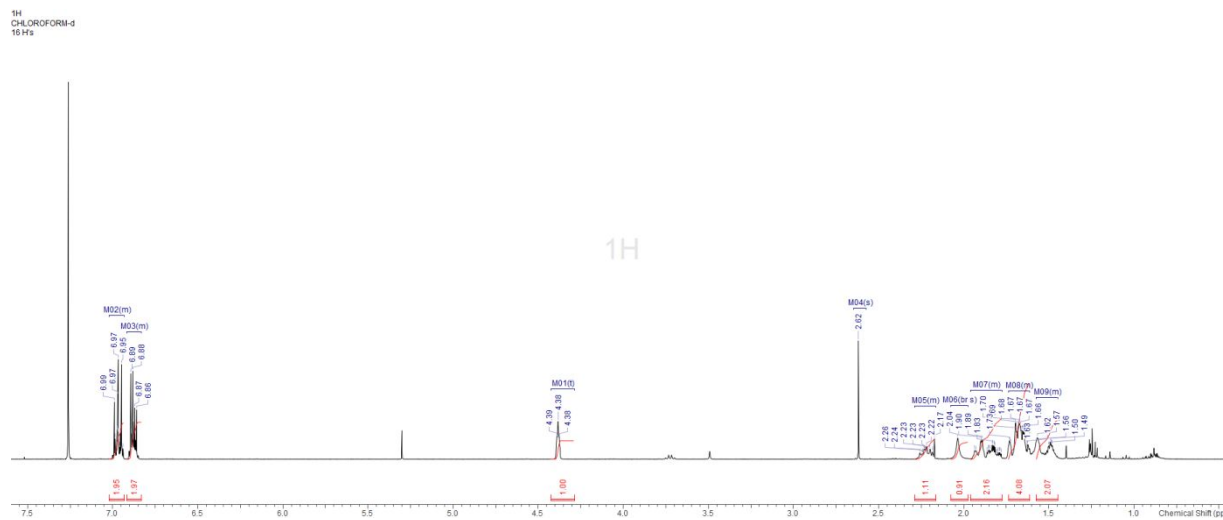

Figure S25. <sup>1</sup>H-NMR spectrum of compound 32a

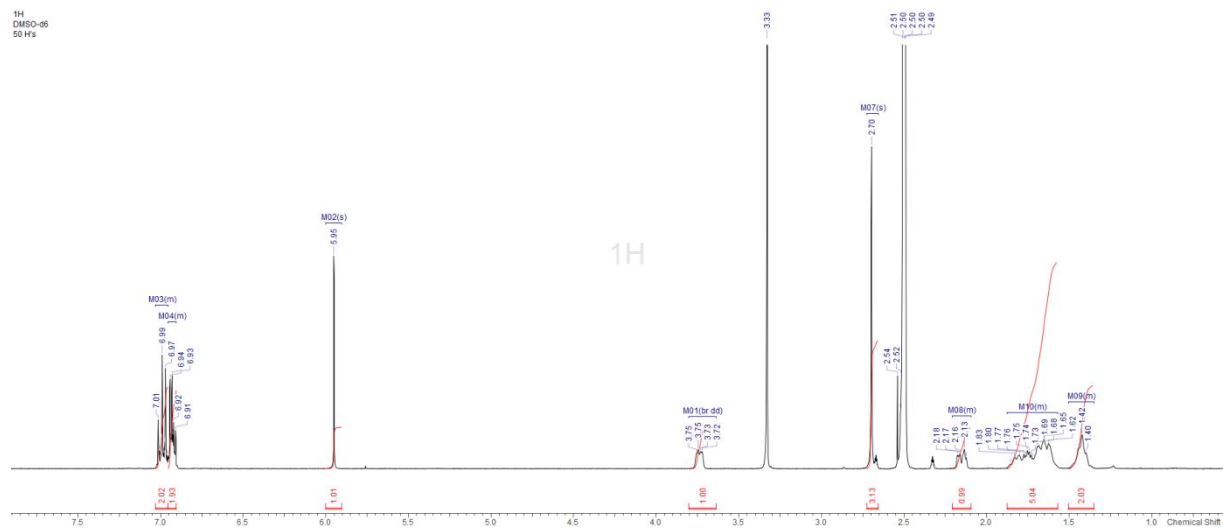

Figure S26.  $^1\text{H}$ -NMR spectrum of compound 32b

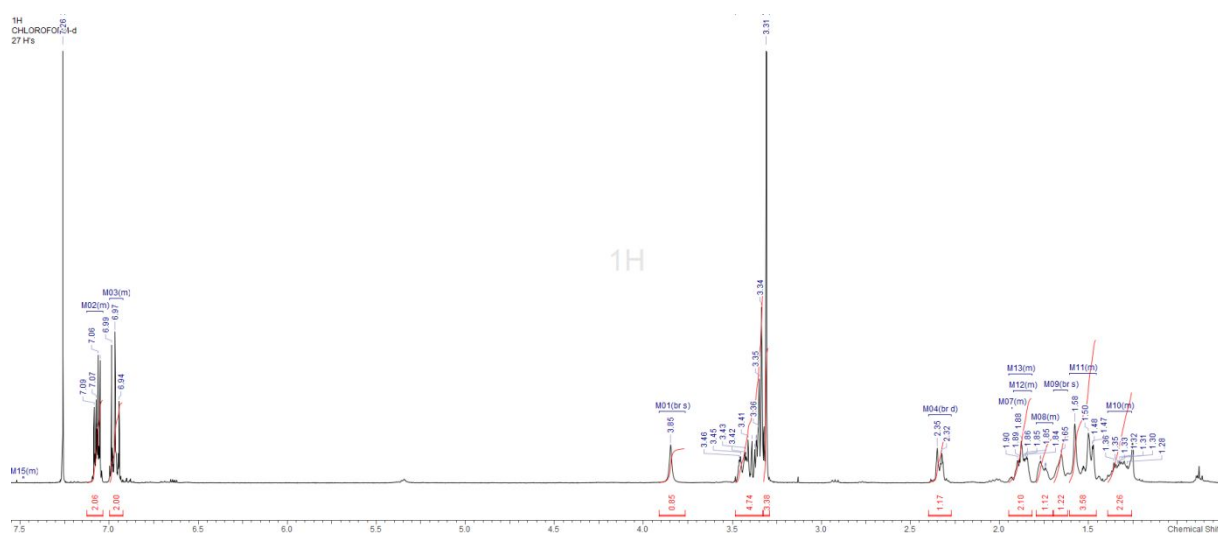

Figure S27.  $^1\text{H}$ -NMR spectrum of compound 32c

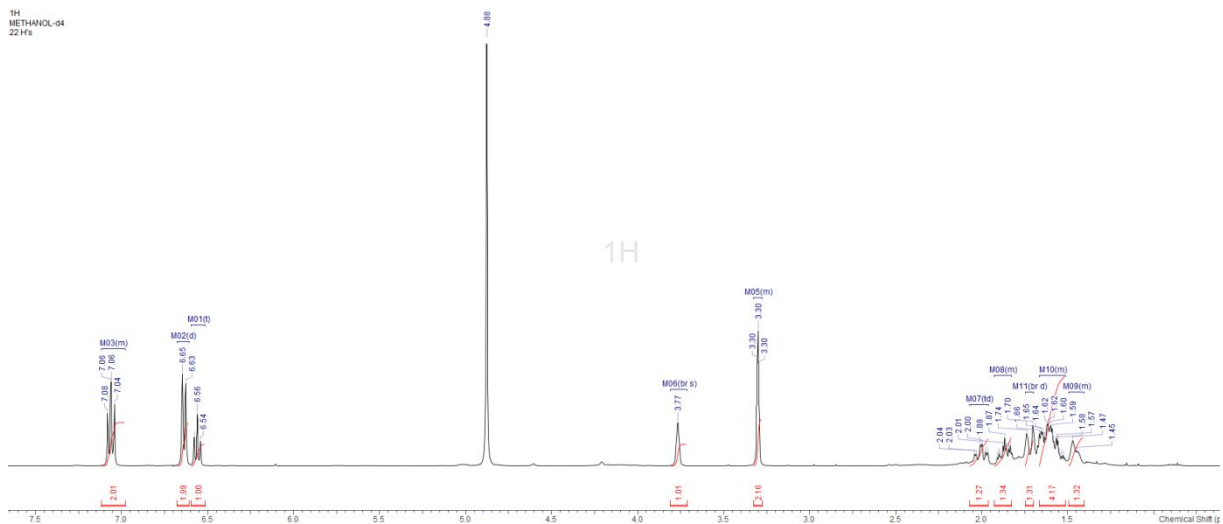

Figure S28. <sup>1</sup>H-NMR spectrum of compound 32d

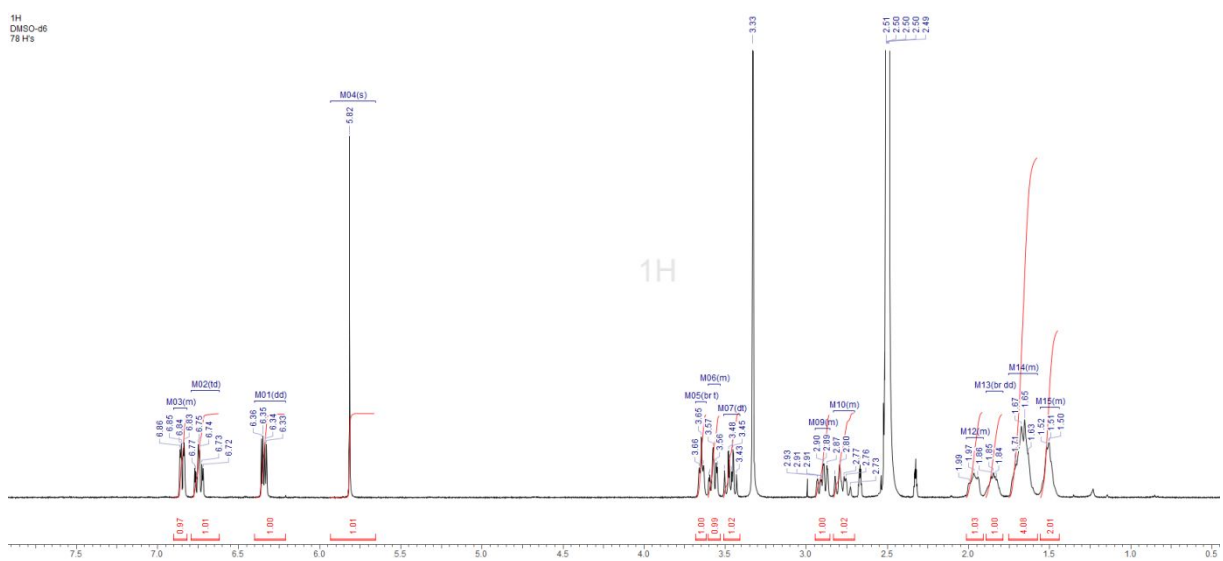

Figure S29. <sup>1</sup>H-NMR spectrum of compound 32e

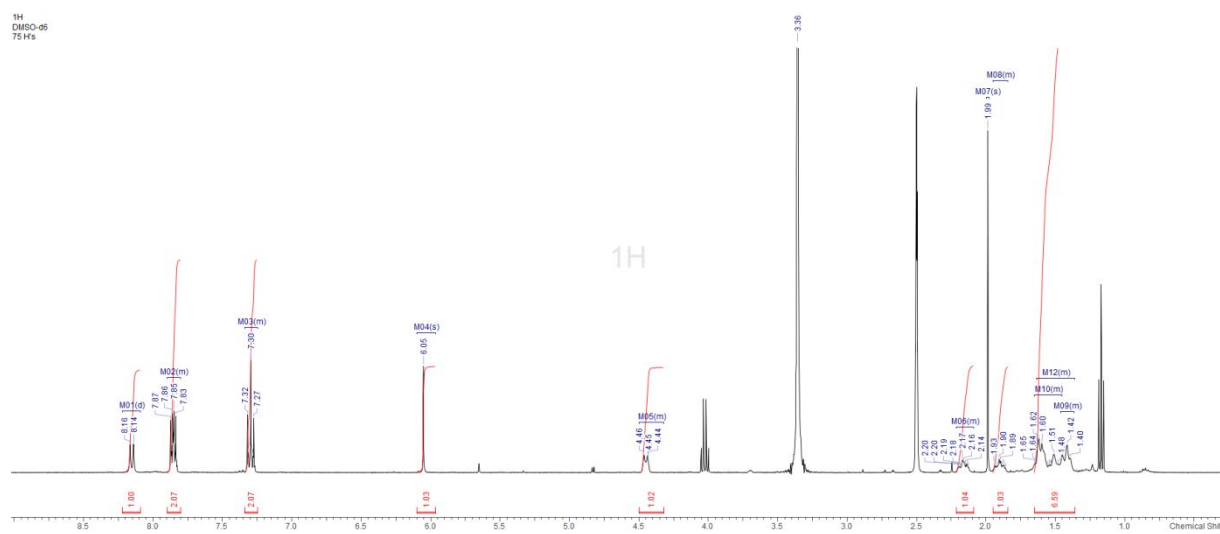

contains residual EtOAc

Figure S30. <sup>1</sup>H-NMR spectrum of compound 32f

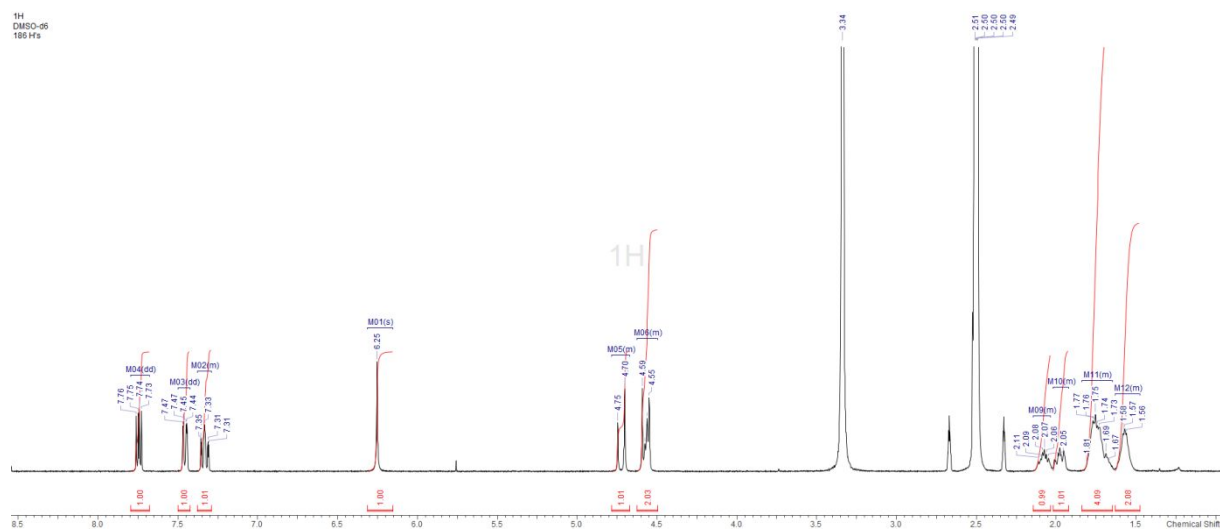

Figure S31. <sup>1</sup>H-NMR spectrum of compound 33

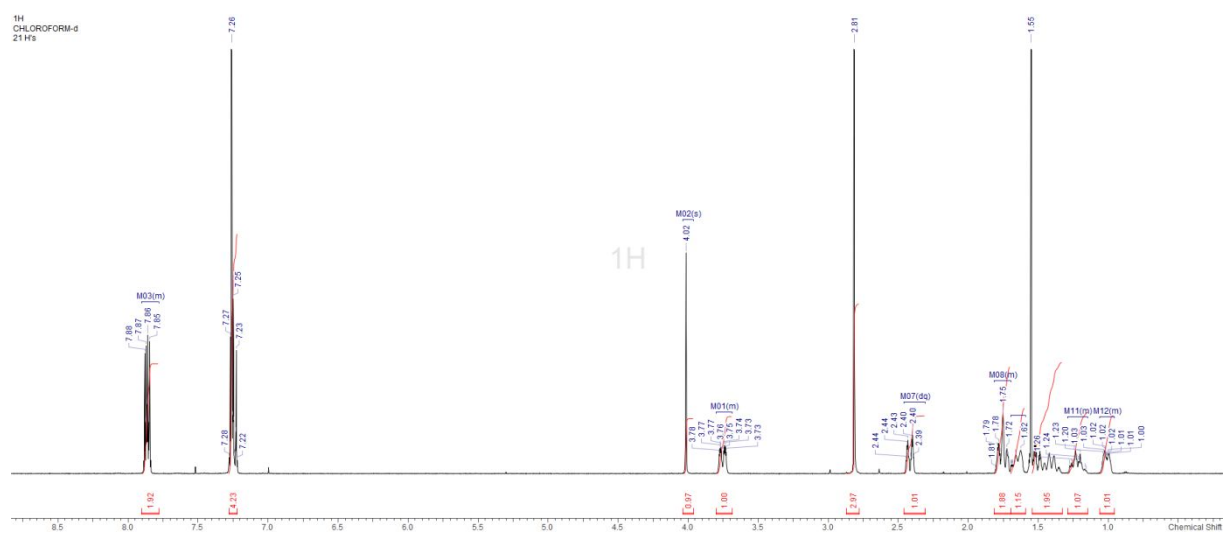

Figure S32. <sup>1</sup>H-NMR spectrum of compound 34a

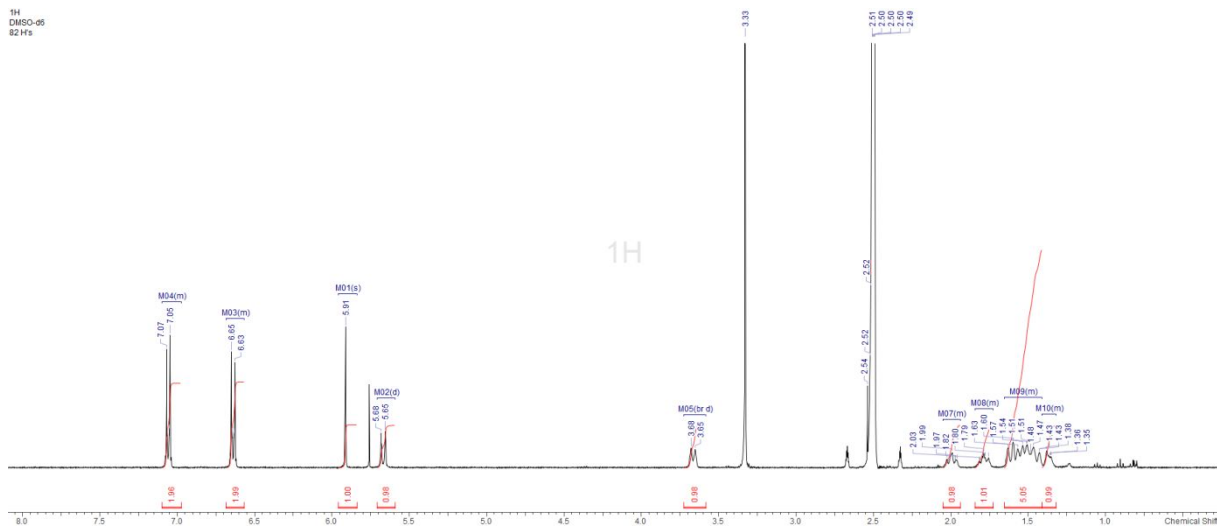

Figure S33. <sup>1</sup>H-NMR spectrum of compound 34b

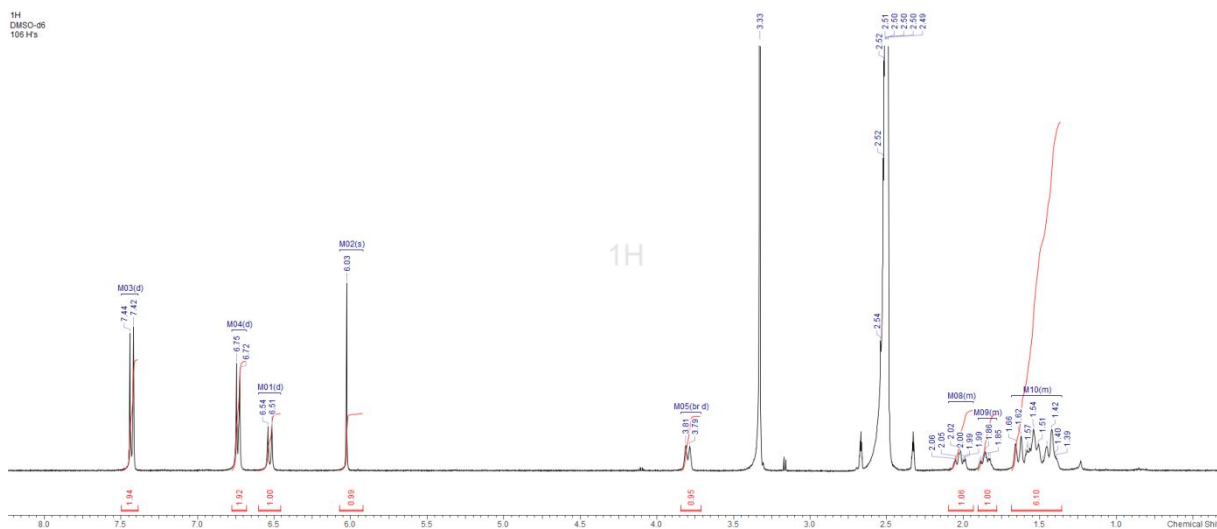

Figure S34. <sup>1</sup>H-NMR spectrum of compound 34c

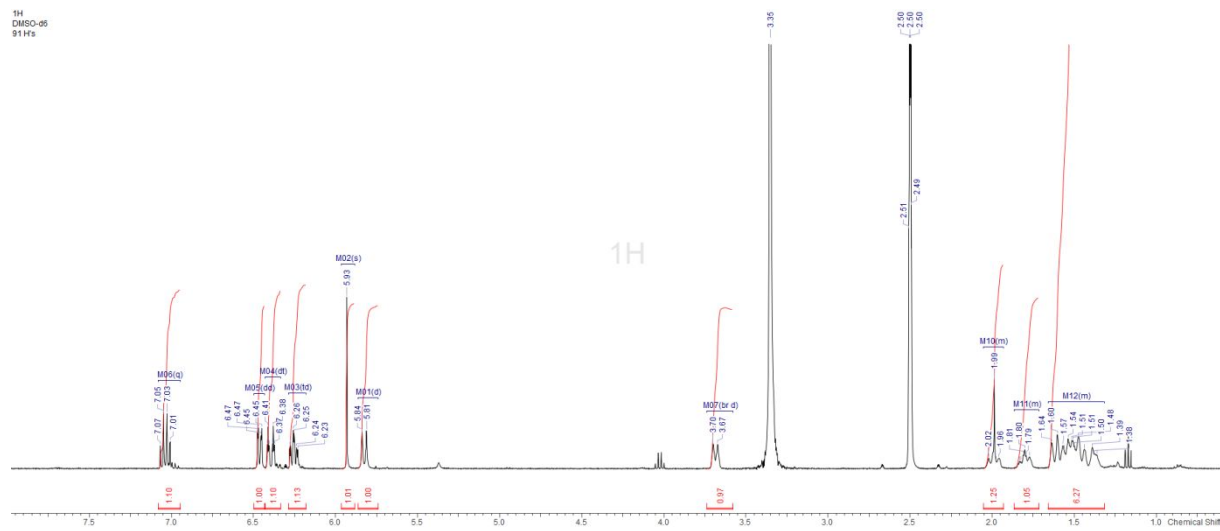

contains residual EtOAc

Figure S35. <sup>1</sup>H-NMR spectrum of compound 34d

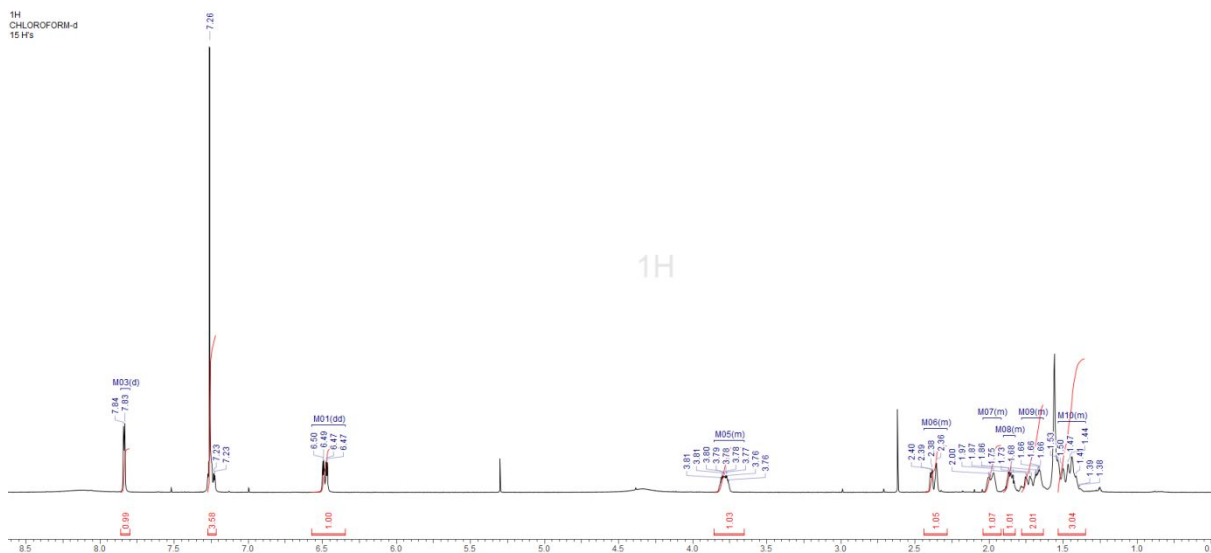

Figure S36. <sup>1</sup>H-NMR spectrum of compound 34e

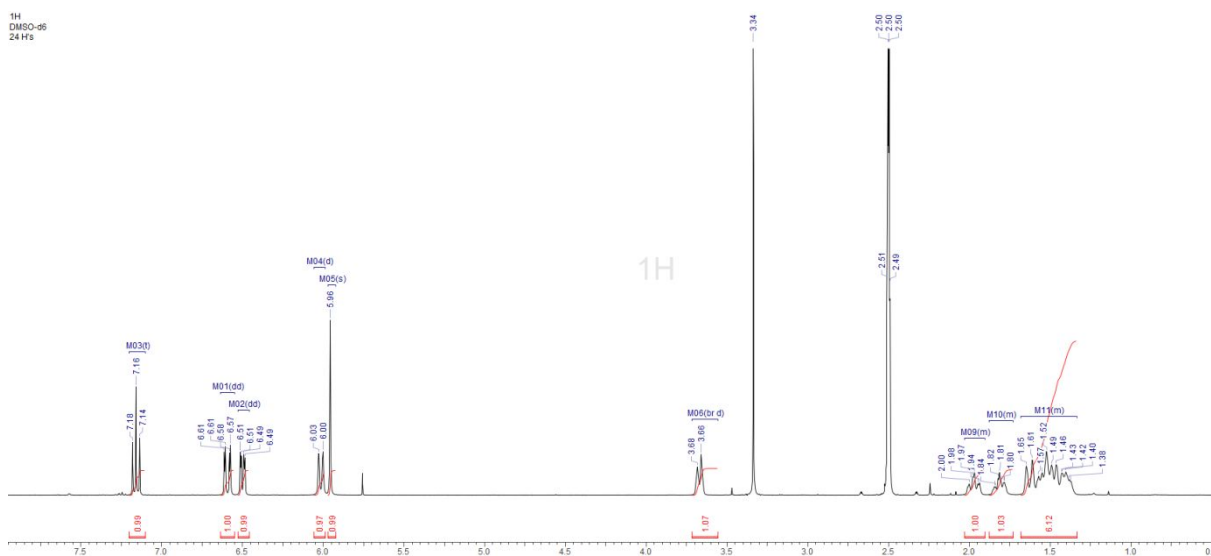



Figure S37. <sup>1</sup>H-NMR spectrum of compound 34f

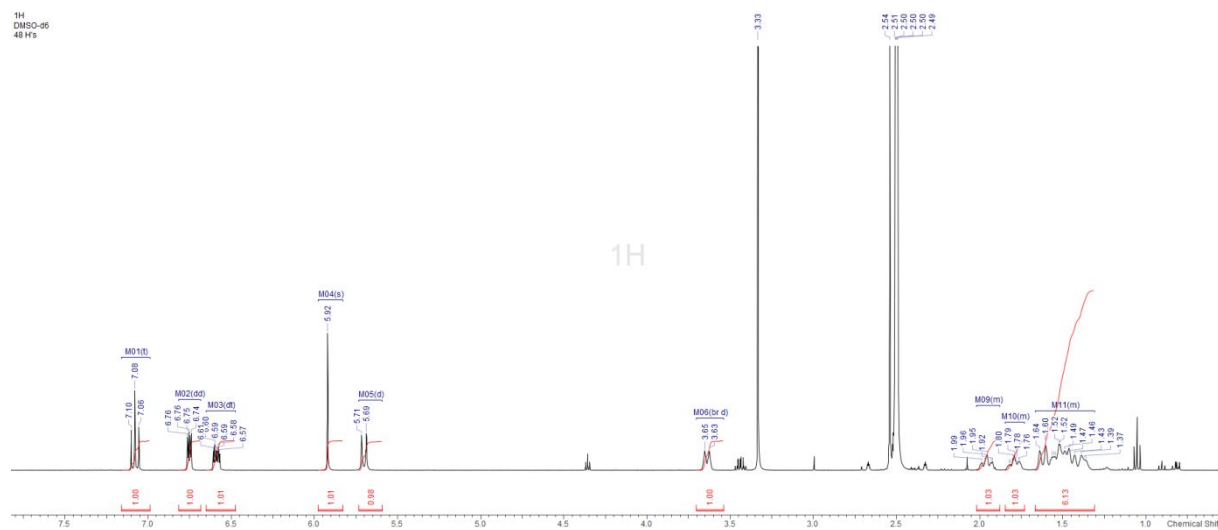

Figure S38. <sup>1</sup>H-NMR spectrum of compound 34g

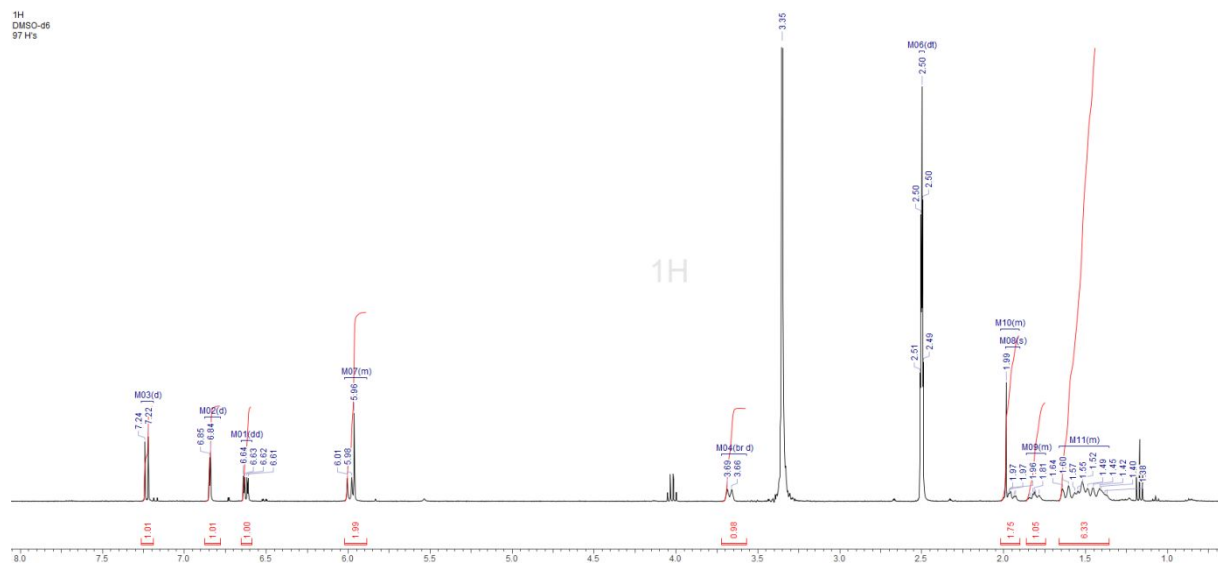

contains residual EtOAc

Figure S39.  $^1\text{H-NMR}$  spectrum of compound 34h

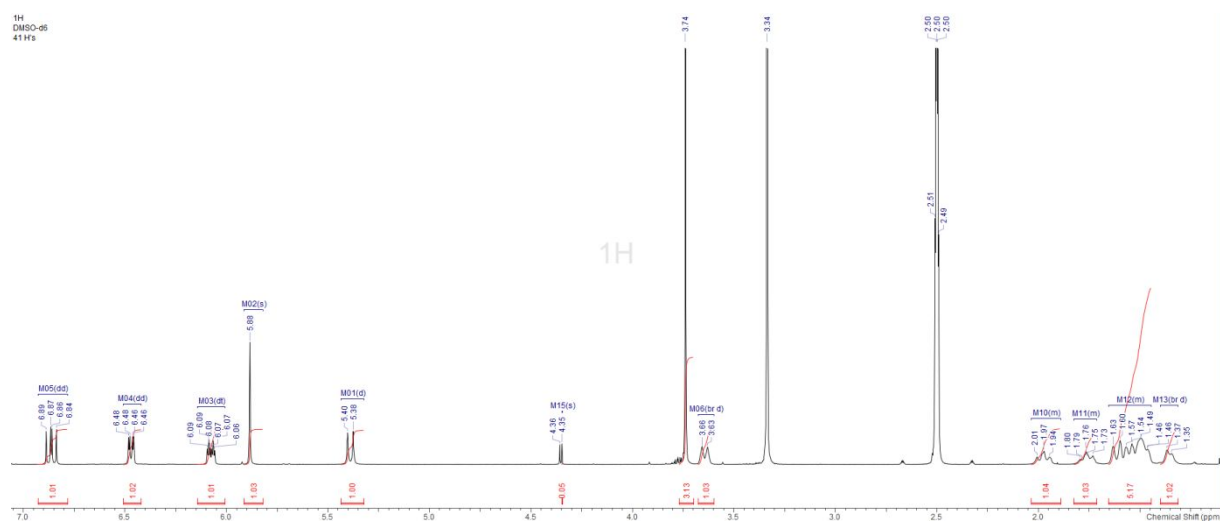

Figure S40.  $^1\text{H-NMR}$  spectrum of compound 34i

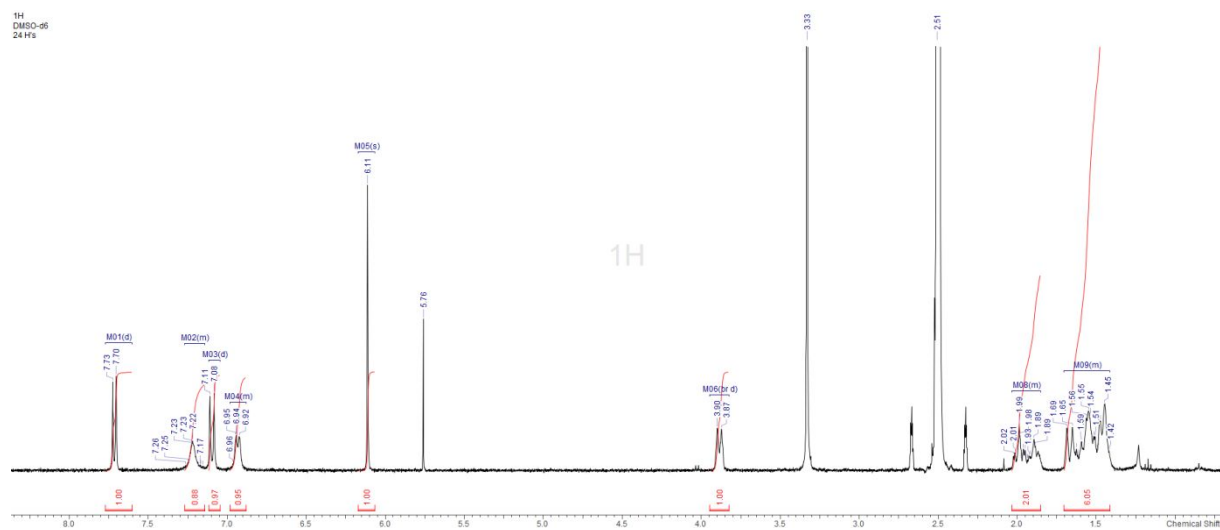

## Vibrational circular dichroism measurements of compound 18

The measurements were performed by BioTools (Antwerp, Belgium).

### MEASUREMENT PARAMETERS

|                                  |                           |
|----------------------------------|---------------------------|
| Concentration                    | 4.1 mg / 100 $\mu$ L      |
| Solvent                          | CDCl <sub>3</sub>         |
| Resolution                       | 4 cm <sup>-1</sup>        |
| PEM setting                      | 1400 cm <sup>-1</sup>     |
| Number of scans/Measurement time | 75.000 scans / 24.0 hours |
| Sample cell                      | BaF <sub>2</sub>          |
| Path length                      | 100 $\mu$ m               |

### CALCULATION DETAILS

|                                                     |                                             |
|-----------------------------------------------------|---------------------------------------------|
| Force fields used in MolMec conformational analyses | MMFF94S, MMFF, SYBYL                        |
| Number of conformations generated                   | 38                                          |
| Methodology and basis set for DFT calculations      | SCRF-B3LYP/6-31G(d)<br>SCRF-B3PW91/6-31G(d) |
| Enantiomer used for calculation                     | (R,R)                                       |
| Number of conformations used in calculated spectrum | 11                                          |
| Number of low-energy conformations shown in report  | 2                                           |

### Remarks:

VCD spectra were recorded using CDCl<sub>3</sub> as a solvent. Baseline corrections were introduced by using spectra of both enantiomers.

Calculations were performed using B3LYP and B3PW91 functionals, to check for consistency.

Figure S41. Calculated and experimental IR and VCD spectra for the (R,R) enantiomer of compound 18

Inspection of the calculated and experimental spectra shows that the B3LYP IR and VCD spectra for the (*R,R*) enantiomer reproduce the experimental IR and VCD spectra of **S17120**.

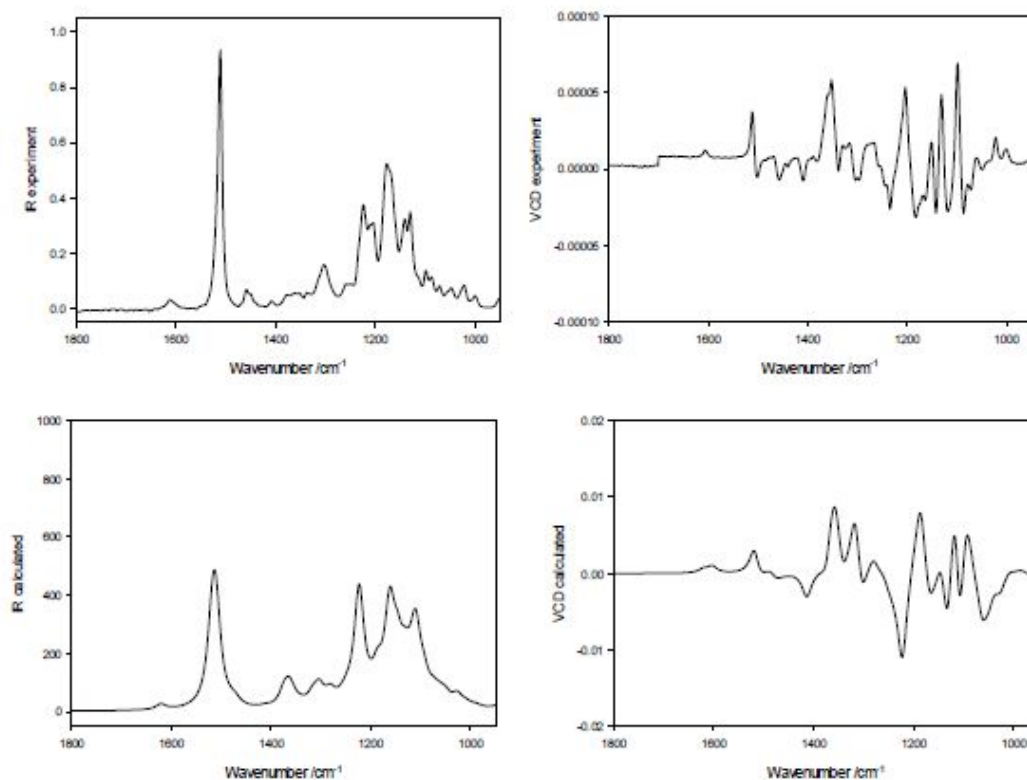

The assignment of the AC of S17120 to (*R,R*) is confirmed by the neighborhood similarities and confidence levels calculated.

Off-target selectivity data (Eurofins-Panlabs radioligand binding assay) of compound

18

Table S1. Eurofins-Panlabs radioligand binding assays on selected targets using compound 18

– Part I

## Experimental Results

| Cat #                                       | Assay Name                                           | Batch* | Spec.  | Rep. | Conc. | % Inh. |
|---------------------------------------------|------------------------------------------------------|--------|--------|------|-------|--------|
| <b>Compound: CHH039-2017, PT #: 1207556</b> |                                                      |        |        |      |       |        |
| 107000                                      | Aldose Reductase                                     | 401131 | rat    | 2    | 10 µM | 3      |
| 107710                                      | ATPase, Na <sup>+</sup> /K <sup>+</sup> , Heart, Pig | 401160 | pig    | 2    | 10 µM | 3      |
| 112020                                      | Carbonic Anhydrase II                                | 401132 | hum    | 2    | 10 µM | 7      |
| 104010                                      | Cholinesterase, Acetyl, ACES                         | 401128 | hum    | 2    | 10 µM | -2     |
| 116020                                      | Cyclooxygenase COX-1                                 | 401157 | hum    | 2    | 10 µM | 8      |
| 118010                                      | Cyclooxygenase COX-2                                 | 401158 | hum    | 2    | 10 µM | 23     |
| 124010                                      | HMG-CoA Reductase                                    | 401134 | hum    | 2    | 10 µM | 8      |
| 132000                                      | Leukotriene LTC <sub>4</sub> Synthase                | 401133 | gp     | 2    | 10 µM | -15    |
| 199017                                      | Lipoxygenase 15-LO                                   | 401198 | hum    | 2    | 10 µM | 23     |
| 140010                                      | Monoamine Oxidase MAO-A                              | 401130 | hum    | 2    | 10 µM | 3      |
| 140120                                      | Monoamine Oxidase MAO-B                              | 401159 | hum    | 2    | 10 µM | 7      |
| 142000                                      | Nitric Oxide Synthase, Neuronal (nNOS)               | 401135 | rat    | 2    | 10 µM | -3     |
| 199010                                      | Nitric Oxide Synthetase, Inducible (iNOS)            | 401197 | mouse  | 2    | 10 µM | 5      |
| 107300                                      | Peptidase, Angiotensin Converting Enzyme             | 401129 | rabbit | 2    | 10 µM | 3      |
| 152000                                      | Phosphodiesterase PDE3                               | 401193 | hum    | 2    | 10 µM | 3      |
| 154000                                      | Phosphodiesterase PDE4                               | 401194 | hum    | 2    | 10 µM | -11    |
| 156000                                      | Phosphodiesterase PDE5                               | 401393 | hum    | 2    | 10 µM | 7      |
| 194020                                      | Thromboxane Synthase                                 | 401136 | hum    | 2    | 10 µM | 6      |
| 200510                                      | Adenosine A <sub>1</sub>                             | 401253 | hum    | 2    | 10 µM | 18     |
| 200610                                      | Adenosine A <sub>2A</sub>                            | 401253 | hum    | 2    | 10 µM | 3      |
| 200720                                      | Adenosine A <sub>3</sub>                             | 401176 | hum    | 2    | 10 µM | 4      |
| 203100                                      | Adrenergic α <sub>1A</sub>                           | 401240 | rat    | 2    | 10 µM | 18     |
| 203630                                      | Adrenergic α <sub>2A</sub>                           | 401239 | hum    | 2    | 10 µM | 7      |
| 203710                                      | Adrenergic α <sub>2B</sub>                           | 401142 | hum    | 2    | 10 µM | 2      |
| 203810                                      | Adrenergic α <sub>2C</sub>                           | 401211 | hum    | 2    | 10 µM | -1     |
| 204010                                      | Adrenergic β <sub>1</sub>                            | 401230 | hum    | 2    | 10 µM | 3      |
| 204110                                      | Adrenergic β <sub>2</sub>                            | 401239 | hum    | 2    | 10 µM | 11     |
| 204200                                      | Adrenergic β <sub>3</sub>                            | 401359 | hum    | 2    | 10 µM | 1      |
| 206000                                      | Androgen (Testosterone)                              | 401322 | hum    | 2    | 10 µM | 47     |
| 210030                                      | Angiotensin AT <sub>1</sub>                          | 401212 | hum    | 2    | 10 µM | 4      |
| 210120                                      | Angiotensin AT <sub>2</sub>                          | 401213 | hum    | 2    | 10 µM | 1      |
| 212510                                      | Bradykinin B <sub>1</sub>                            | 401177 | hum    | 2    | 10 µM | 9      |
| 212620                                      | Bradykinin B <sub>2</sub>                            | 401170 | hum    | 2    | 10 µM | 4      |
| 217030                                      | Cannabinoid CB <sub>1</sub>                          | 401143 | hum    | 2    | 10 µM | -15    |

Note: Items meeting criteria for significance (≥50% stimulation or inhibition) are highlighted.

\* Batch: Represents compounds tested concurrently in the same assay(s).

gp=Guinea pig; hum=Human

**Table S2. Eurofins-Panlabs radioligand binding assays on selected targets using compound 18 – Part II**

## Experimental Results

| Cat #  | Assay Name                                         | Batch* | Spec.  | Rep. | Conc. | % Inh. |
|--------|----------------------------------------------------|--------|--------|------|-------|--------|
| 217100 | Cannabinoid CB <sub>2</sub>                        | 401141 | hum    | 2    | 10 µM | 21     |
| 219500 | Dopamine D <sub>1</sub>                            | 401243 | hum    | 2    | 10 µM | -14    |
| 219600 | Dopamine D <sub>2L</sub>                           | 401370 | hum    | 2    | 10 µM | 12     |
| 219700 | Dopamine D <sub>2a</sub>                           | 401241 | hum    | 2    | 10 µM | 13     |
| 219800 | Dopamine D <sub>3</sub>                            | 401243 | hum    | 2    | 10 µM | 9      |
| 224010 | Endothelin ET <sub>A</sub>                         | 401229 | hum    | 2    | 10 µM | 7      |
| 224110 | Endothelin ET <sub>B</sub>                         | 401366 | hum    | 2    | 10 µM | -4     |
| 226010 | Estrogen ER $\alpha$                               | 401171 | hum    | 2    | 10 µM | 75     |
| 226810 | GABA <sub>A</sub> , Chloride Channel, TBOB         | 401172 | rat    | 2    | 10 µM | -8     |
| 226600 | GABA <sub>A</sub> , Flunitrazepam, Central         | 401246 | rat    | 2    | 10 µM | -17    |
| 228510 | GABA <sub>B</sub> , Non-Selective                  | 401185 | rat    | 2    | 10 µM | 3      |
| 232030 | Glucocorticoid                                     | 401208 | hum    | 2    | 10 µM | 4      |
| 232600 | Glutamate, AMPA                                    | 401173 | rat    | 2    | 10 µM | 8      |
| 232700 | Glutamate, Kainate                                 | 401296 | rat    | 2    | 10 µM | -3     |
| 232810 | Glutamate, NMDA, Agonism                           | 401224 | rat    | 2    | 10 µM | 5      |
| 232910 | Glutamate, NMDA, Glycine                           | 401224 | rat    | 2    | 10 µM | 9      |
| 239300 | Growth Hormone Secretagogue (GHS, Ghrelin)         | 401154 | hum    | 2    | 10 µM | 3      |
| 239610 | Histamine H <sub>1</sub>                           | 401249 | hum    | 2    | 10 µM | 6      |
| 239710 | Histamine H <sub>2</sub>                           | 401256 | hum    | 2    | 10 µM | -8     |
| 239820 | Histamine H <sub>3</sub>                           | 401166 | hum    | 2    | 10 µM | -4     |
| 243000 | Insulin                                            | 401420 | rat    | 2    | 10 µM | 8      |
| 252200 | Motilin                                            | 401156 | hum    | 2    | 10 µM | 13     |
| 252610 | Muscarinic M <sub>1</sub>                          | 401216 | hum    | 2    | 10 µM | -1     |
| 252710 | Muscarinic M <sub>2</sub>                          | 401231 | hum    | 2    | 10 µM | -2     |
| 252810 | Muscarinic M <sub>3</sub>                          | 401231 | hum    | 2    | 10 µM | 21     |
| 252910 | Muscarinic M <sub>4</sub>                          | 401217 | hum    | 2    | 10 µM | 14     |
| 258590 | Nicotinic Acetylcholine                            | 401227 | hum    | 2    | 10 µM | -7     |
| 260130 | Opiate $\delta_1$ (OP1, DOP)                       | 401150 | hum    | 2    | 10 µM | -6     |
| 260210 | Opiate $\kappa$ (OP2, KOP)                         | 401150 | hum    | 2    | 10 µM | 7      |
| 260410 | Opiate $\mu$ (OP3, MOP)                            | 401232 | hum    | 2    | 10 µM | 5      |
| 299005 | Progesterone PR-B                                  | 401321 | hum    | 2    | 10 µM | 65     |
| 268700 | Purinergic P2X                                     | 401151 | rabbit | 2    | 10 µM | 3      |
| 268810 | Purinergic P2Y                                     | 401152 | rat    | 2    | 10 µM | -6     |
| 271110 | Serotonin (5-Hydroxytryptamine) 5-HT <sub>1A</sub> | 401182 | hum    | 2    | 10 µM | 10     |
| 271650 | Serotonin (5-Hydroxytryptamine) 5-HT <sub>2A</sub> | 401181 | hum    | 2    | 10 µM | -2     |

Note: Items meeting criteria for significance ( $\geq 50\%$  stimulation or inhibition) are highlighted.

\* Batch: Represents compounds tested concurrently in the same assay(s).

gp=Guinea pig; hum=Human

**Table S3. Eurofins-Panlabs radioligand binding assays on selected targets using compound 18  
– Part III**

### Experimental Results

| Cat #  | Assay Name                                          | Batch* | Spec. | Rep. | Conc. | % Inh. |
|--------|-----------------------------------------------------|--------|-------|------|-------|--------|
| 271700 | Serotonin (5-Hydroxytryptamine) 5-HT <sub>2a</sub>  | 401168 | hum   | 2    | 10 µM | -4     |
| 271800 | Serotonin (5-Hydroxytryptamine) 5-HT <sub>2c</sub>  | 401180 | hum   | 2    | 10 µM | 3      |
| 202000 | Transporter, Adenosine                              | 401137 | gp    | 2    | 10 µM | -2     |
| 220320 | Transporter, Dopamine (DAT)                         | 401164 | hum   | 2    | 10 µM | 84     |
| 226400 | Transporter, GABA                                   | 401186 | rat   | 2    | 10 µM | -5     |
| 204410 | Transporter, Norepinephrine (NET)                   | 401164 | hum   | 2    | 10 µM | 16     |
| 274030 | Transporter, Serotonin (5-Hydroxytryptamine) (SERT) | 401182 | hum   | 2    | 10 µM | 3      |
| 287530 | Vasopressin V <sub>1A</sub>                         | 401219 | hum   | 2    | 10 µM | -7     |

#### Estrogen ERalpha

IC<sub>50</sub> [µM]=5      Ki [µM]=0.72

#### Progesterone PR-B

IC<sub>50</sub> [µM]=5      Ki [µM]= 4

#### Transporter, Dopamine (DAT)

IC<sub>50</sub> [µM]=1.2      Ki [µM]=0.94

## Determination of brain/plasma ratio and measured plasma exposure levels in rat using compound 18 (BAY-390)

Brain/Plasma ratio of BAY-390 was assessed in female CD mice following i.v. administration. Total brain and plasma concentrations (A) were measured, and unbound level (B) were estimated using fraction unbound value of 8.1% for mouse plasma and 4.3% for brain tissues.

Figure S42. (A) total brain and plasma concentration, (B) estimated unbound brain and plasma levels using measured fraction unbound values of BAY-390

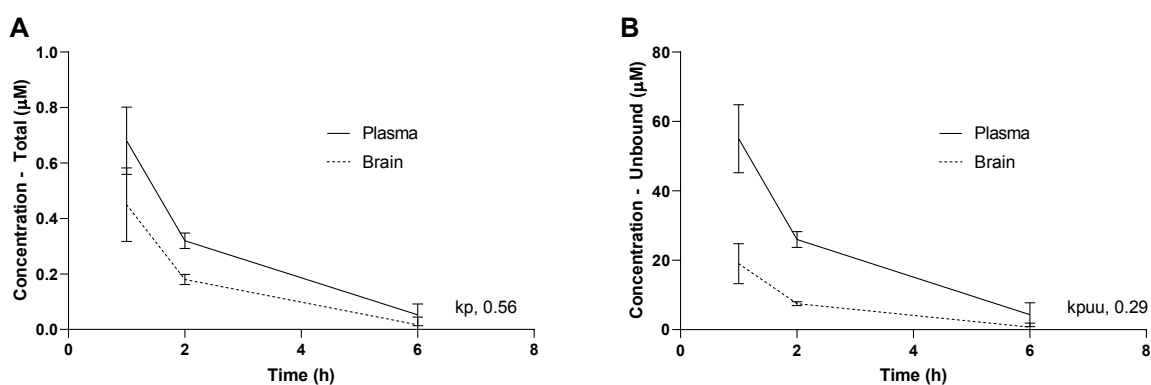

BAY-390 plasma concentration in Rat Sprague Dawley male following p.o. administration of a 50mg/kg solution in DMSO/PEG400/Water (20/20/60, vol/vol). Unbound level were estimated using fraction unbound value of 6.0% for rat plasma.



Figure S43. total and unbound plasma concentration of BAY-390 in rat after p.o administration of a 50 mg/kg in DMSO/PEG400/Water (20/20/60, vol/vol)

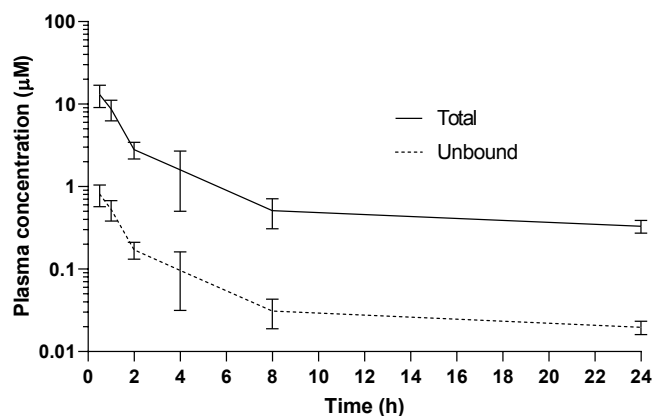

#### Method: Estimation of Plasma Protein Binding by Equilibrium Dialysis

Binding of test compounds to plasma proteins is measured by equilibrium dialysis in a 96-well format using ht-dialysis equipment made of Teflon and a semipermeable membrane (regenerated cellulose, MWCO 12-14K). The membrane separates the plasma and buffer side (50 mM phosphate buffer) filled with 150 µl each. The test compound is added in a concentration of 3 µM to the plasma side and binds to plasma proteins. The unbound fraction of the test compound passes the membrane and distributes on both sides until equilibrium is reached, which is usually the case after 6-8h at 37°C. Compound concentration of plasma and buffer side is measured by LC-MSMS analytics. For this both sides are diluted with buffer and plasma to achieve the same matrix (10% plasma) and subsequently are precipitated with methanol. From the quotient of buffer and plasma concentration the free (unbound) fraction (fu) is calculated. Stability and recovery controls are included. Additionally, the test compound is dialyzed in buffer against buffer in order to estimate non-specific binding to equipment and/or membrane and to investigate in the establishment of the equilibrium. Due to

the osmotic pressure of the plasma proteins a dilution of the plasma takes place during the incubation (volume shift). The potential imprecision is addressed by inclusion of an empirical factor in the calculation of the  $f_u$ . Establishment of equilibrium and stability in plasma should be at least 80% and the recovery in plasma should at least be 30%. A free fraction of <1% is designated as high, between 1 and 10% as moderate and of >10% as low plasma protein binding.

#### **Method: Brain/Plasma ratio determination**

Penetration of test compounds into the brain was assessed in female CD mice after intravenous administration. Test compounds were administered i.v., at a dose of 10 mg/kg as solution using solubilizers such as PEG400 in well-tolerated amounts. Separate groups of animals (3 animals per group) were sacrificed at 1, 2, and 6h after dosing and blood and brain were sampled. Blood was collected into Lithium-Heparintubes (Monovetten<sup>®</sup>, Sarstedt) and centrifuged for 15 min at 3000 rpm. An aliquot of 100  $\mu$ L from the supernatant (Plasma) was taken and precipitated by addition of 400  $\mu$ L cold acetonitril and frozen at -20 °C over night. Brain samples were homogenized with 50 mM Tris-HCl buffer, pH7.5 (1:5 w/v), precipitated with acetonitril (1:5, v/v) and frozen at -20 °C over night. Plasma and brain samples were subsequently thawed and centrifuged at 3000 rpm, 4°C for 20 minutes. Aliquots of the supernatants were taken for analytical testing using an Agilent 1200 HPLC-system with LCMS/MS detection.

From the concentration-time profiles the AUC (area under the concentration-time curve) in plasma and brain were calculated and the ratio  $AUC_{\text{brain}}/AUC_{\text{plasma}}$  was reported as the

brain-plasma ratio. Due to residual blood in the non-perfused brain tissue the lower limit for the brain-plasma ratio by this method approximates 1-2%.

### Characterization and synthesis of intermediates 22b-i, 23b-i and 26b-i

**Table S4. Analytical data of intermediates 22b-i, 23b-i and 26b-i**

| Name (yield; purity)                                                                                  | Structure | Analytics                                                                                                                                                                                                                                                                                 |
|-------------------------------------------------------------------------------------------------------|-----------|-------------------------------------------------------------------------------------------------------------------------------------------------------------------------------------------------------------------------------------------------------------------------------------------|
| 6-[(4-Chlorophenyl)methyl]-5,5-dimethyl-cyclohex-2-en-1-one ( <b>22b</b> ; yield: 27%, purity 93%).   |           | MS (ESIpos): m/z = 248.95 / 250.95 (M+H) <sup>+</sup> ; <sup>1</sup> H-NMR (500 MHz, CDCl <sub>3</sub> ) δ [ppm]: 1.01 (s, 3H), 1.12 (s, 3H), 2.28 – 2.32 (m, 2H), 2.42 (dd, 1H), 2.73 (dd, 1H), 2.95 (dd, 1H), 5.98 (dt, 1H), 6.77 (dt, 1H), 7.13 (d, 2H), 7.20 – 7.23 (d, 2H)           |
| 2-[(4-Chlorophenyl)methyl]-3,3-dimethyl-cyclohexanone ( <b>23b</b> ; yield: 91%, purity 93%).         |           | <sup>1</sup> H-NMR (500 MHz, CDCl <sub>3</sub> ) δ [ppm]: 0.84 (s, 3H), 1.19 (s, 3H), 1.62 (dtd, 1H), 1.72 (td, 1H), 1.77 – 1.87 (m, 1H), 1.93 (m, 1H), 2.18 – 2.25 (dtd, 1H), 2.29 – 2.35 (m, 1H), 2.42 – 2.46 (dd, 1H), 2.52 (dd, 1H), 3.05 (dd, 1H), 7.13 (d, 2H), 7.17 – 7.21 (d, 2H) |
| 4-[(6,6-Dimethyl-2-oxo-cyclohex-3-en-1-yl)methyl]benzonitrile ( <b>22c</b> ; yield: 14%, purity 85%). |           | MS (ESIpos): m/z = 239.95 (M+H) <sup>+</sup> ; <sup>1</sup> H-NMR (500 MHz, CDCl <sub>3</sub> ) δ [ppm]: 1.01 (s, 3H), 1.15 (s, 3H), 2.28 (ddd, 1H), 2.37 (dt, 1H), 2.47 (dd, 1H), 2.79 (dd, 1H), 3.05 (dd, 1H), 5.99 (dt, 1H), 6.79 (ddd, 1H), 7.32 (d, 2H), 7.52 – 7.55 (d, 2H)         |
| 4-[(2,2-Dimethyl-6-oxo-cyclohexyl)methyl]benzonitrile ( <b>23c</b> ; yield: 96%, purity 90%).         |           | <sup>1</sup> H-NMR (500 MHz, CDCl <sub>3</sub> ) δ [ppm]: 0.83 (s, 3H), 1.19 (s, 3H), 1.59 – 1.65 (m, 1H), 1.70 – 1.86 (m, 2H), 1.89 – 1.96 (m, 1H), 2.17 – 2.24 (m, 1H), 2.30 (ddt, 1H), 2.44 – 2.50 (m, 1H), 2.59 (dd, 1H), 3.11 (dd, 1H), 7.30 (d, 2H), 7.47 – 7.51 (m, 2H)            |
| 5,5-Dimethyl-6-(p-tolylmethyl)cyclohex-2-en-1-one ( <b>22d</b> ; yield: 12%, purity 95%).             |           | LCMS (ESIpos): m/z = 229 (M+H) <sup>+</sup> ; <sup>1</sup> H-NMR (500 MHz, CDCl <sub>3</sub> ) δ [ppm]: 7.27 (s, 4H), 7.03 – 6.87 (m, 1H), 6.24 – 6.11 (m, 1H), 3.13 (dd, 1H), 2.95 (dd, 1H), 2.63 (dd, 1H), 2.50 (s, 5H), 1.31 (s, 3H), 1.23 (s, 3H)                                     |
| 3,3-Dimethyl-2-(p-tolylmethyl)cyclohexanone ( <b>23d</b> ; yield: 83%, purity 95%).                   |           | <sup>1</sup> H-NMR (500 MHz, CDCl <sub>3</sub> ) δ [ppm]: 7.02 (d, 2H), 6.97 (d, 2H), 2.98 (dd, 1H), 2.49 – 2.44 (m, 1H), 2.42 – 2.39 (m, 1H), 2.28 – 2.23 (m, 1H), 2.21 (s, 3H), 2.18 – 2.10 (m, 1H), 1.88 – 1.70 (m, 2H), 1.63 (td, 1H), 1.55 (dtd, 1H), 1.11 (s, 3H), 0.77 (s, 3H)     |

|                                                                                                         |                                                                                     |                                                                                                                                                                                                                                                                                                                  |
|---------------------------------------------------------------------------------------------------------|-------------------------------------------------------------------------------------|------------------------------------------------------------------------------------------------------------------------------------------------------------------------------------------------------------------------------------------------------------------------------------------------------------------|
| 6-[(4-Methoxyphenyl)methyl]-5,5-dimethyl-cyclohex-2-en-1-one ( <b>22e</b> ; yield: 11%, purity 95%).    | 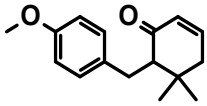   | LCMS (ESIpos): $m/z = 245$ (M+H) <sup>+</sup> ; <sup>1</sup> H-NMR (500 MHz, CDCl <sub>3</sub> ) $\delta$ [ppm]: 7.15 – 7.08 (m, 2H), 6.83 – 6.79 (m, 2H), 6.78 – 6.74 (m, 1H), 5.98 (dt, 1H), 3.78 (s, 3H), 2.95 – 2.85 (m, 1H), 2.75 (dd, 1H), 2.41 (dd, 1H), 2.35 – 2.24 (m, 2H), 1.12 (s, 3H), 1.03 (s, 3H)  |
| 2-[(4-Methoxyphenyl)methyl]-3,3-dimethyl-cyclohexanone ( <b>23e</b> ; yield: 73%, purity 95%).          |    | <sup>1</sup> H-NMR (500 MHz, CDCl <sub>3</sub> ) $\delta$ [ppm]: 7.16 – 7.11 (m, 2H), 6.83 – 6.77 (m, 2H), 3.78 (s, 3H), 3.05 (dd, 1H), 2.55 (dd, 1H), 2.51 – 2.45 (m, 1H), 2.39 – 2.31 (m, 1H), 2.29 – 2.19 (m, 1H), 1.99 – 1.79 (m, 2H), 1.73 (td, 1H), 1.67 – 1.63 (m, 1H), 1.20 (s, 3H), 0.87 (s, 3H)        |
| Methyl 4-[(6,6-dimethyl-2-oxocyclohex-3-en-1-yl)methyl]benzoate ( <b>22f</b> ; yield: 19%, purity 88%). |    | LC-MS (ESIpos) $m/z = 273.2$ (M+H) <sup>+</sup>                                                                                                                                                                                                                                                                  |
| 6-[(3-Fluorophenyl)methyl]-5,5-dimethyl-cyclohex-2-en-1-one ( <b>22g</b> ; yield: 23%, purity 72%).     |    | LCMS (ESIpos) $m/z = 233.0$ (M+H) <sup>+</sup> ; <sup>1</sup> H-NMR (500 MHz, CDCl <sub>3</sub> ) $\delta$ [ppm]: 1.01 (s, 3H), 1.13 (s, 3H), 2.30 (dd, 1H), 2.31 (td, 1H), 2.46 (dd, 1H), 2.74 (dd, 1H), 3.00 (dd, 1H), 5.99 (dt, 1H), 6.78 (dt, 1H), 6.85 (td, 1H), 6.92 (dt, 1H), 6.98 (d, 1H), 7.20 (td, 1H) |
| 2-[(3-Fluorophenyl)methyl]-3,3-dimethyl-cyclohexanone ( <b>23g</b> ; yield: 37%, purity 99%).           |  | <sup>1</sup> H-NMR (500 MHz, CDCl <sub>3</sub> ) $\delta$ [ppm]: 0.77 (s, 3H), 1.10 (s, 3H), 1.49 – 1.62 (m, 1H), 1.64 – 1.90 (m, 3H), 2.10 – 2.25 (m, 1H), 2.25 – 2.37 (m, 1H), 2.54 – 2.68 (m, 2H), 2.94 (td, 1H), 6.86 – 7.05 (m, 3H), 7.19 – 7.32 (m, 1H)                                                    |
| 3-[(6,6-Dimethyl-2-oxocyclohex-3-en-1-yl)methyl]benzonitrile ( <b>22h</b> ; yield: 15%, purity 95%).    |  | LCMS (ESIpos): $m/z = 240$ (M+H) <sup>+</sup> ; <sup>1</sup> H-NMR (500 MHz, CDCl <sub>3</sub> ) $\delta$ [ppm]: 7.55 – 7.44 (m, 3H), 7.37 (t, 1H), 6.82 (ddd, 1H), 6.01 (dt, 1H), 3.04 (dd, 1H), 2.79 (dd, 1H), 2.47 (dd, 1H), 2.42 – 2.26 (m, 2H), 1.18 (s, 3H), 1.03 (s, 3H)                                  |
| 3-[(2,2-Dimethyl-6-oxocyclohexyl)methyl]benzonitrile ( <b>23h</b> ; yield: 92%, purity 95%).            |  | <sup>1</sup> H-NMR (500 MHz, CDCl <sub>3</sub> ) $\delta$ [ppm]: 7.53 – 7.43 (m, 3H), 7.35 (t, 1H), 3.12 (dd, 1H), 2.60 (dd, 1H), 2.48 (d, 1H), 2.40 – 2.32 (m, 1H), 2.29 – 2.19 (m, 1H), 1.97 (dtd, 1H), 1.91 – 1.74 (m, 2H), 1.69 – 1.63 (m, 1H), 1.61 (s, 1H), 1.24 (s, 3H), 0.86 (s, 3H)                     |
| 6-[(2,4-Difluorophenyl)methyl]-5,5-dimethyl-cyclohex-2-en-1-one ( <b>22i</b> ; yield: 39%, purity 82%). |  | LCMS (ESIpos): $m/z = 251.0$ (M+H) <sup>+</sup> ; <sup>1</sup> H-NMR (500 MHz, CDCl <sub>3</sub> ) $\delta$ [ppm]: 1.04 (s, 3H), 1.13 (s, 3H), 2.31 (dd, 2H), 2.44 (dd, 1H), 2.81 (dd, 1H), 2.88 (dd, 1H), 5.96 (dt, 1H), 6.70 – 6.80 (m, 3H), 7.26 (s, 1H)                                                      |
| 2-[(2,4-Difluorophenyl)methyl]-3,3-dimethyl-cyclohexanone ( <b>23i</b> ; yield: 85%, purity 74%).       |  | LCMS (ESIpos): $m/z = 253.0$ (M+H) <sup>+</sup> ; <sup>1</sup> H-NMR (500 MHz, CDCl <sub>3</sub> ) $\delta$ [ppm]: 0.85 (s, 3H), 1.20 (s, 3H), 1.61 (dtd, 1H), 1.73 (td, 1H), 1.82 (ddt, 1H), 1.92 (ddt,                                                                                                         |

|  |  |                                                                                                                     |
|--|--|---------------------------------------------------------------------------------------------------------------------|
|  |  | 1H), 2.22 (tdd, 1H), 2.31 (dtd, 1H), 2.49 (d, 1H), 2.69 (d, 1H), 2.92 (ddd, 1H), 6.68 – 6.76 (m, 2H), 7.30 (td, 1H) |
|--|--|---------------------------------------------------------------------------------------------------------------------|

| Name (yield; purity)                                                                        | Structure                                                                           | Analytcs                                                                                                                                                                                                                                                                                                              |
|---------------------------------------------------------------------------------------------|-------------------------------------------------------------------------------------|-----------------------------------------------------------------------------------------------------------------------------------------------------------------------------------------------------------------------------------------------------------------------------------------------------------------------|
| 2-[(5-Chloro-3-thienyl)methyl]cyclohexanone ( <b>26b</b> ; yield: 43%, purity 99%).         | 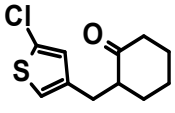   | <sup>1</sup> H-NMR (500 MHz, CDCl <sub>3</sub> ) δ [ppm]: 1.29 - 1.42 (m, 1 H), 1.61 - 1.73 (m, 2 H), 1.79 - 1.94 (m, 1 H), 2.01 - 2.19 (m, 2 H), 2.25 - 2.36 (m, 1 H), 2.39 - 2.47 (m, 1 H), 2.47 - 2.58 (m, 1 H), 2.59 - 2.69 (m, 1 H), 3.14 - 3.29 (m, 1 H), 6.46 - 6.58 (m, 1 H), 6.69 (d, 1 H)                   |
| 4-[(2-Oxocyclohexyl)methyl]thiophene-2-carbonitrile ( <b>26c</b> ; yield: 54%, purity 93%). |    | <sup>1</sup> H-NMR (500 MHz, CDCl <sub>3</sub> ) δ [ppm]: 1.32 - 1.45 (m, 1 H), 1.60 - 1.74 (m, 2 H), 1.84 - 1.94 (m, 1 H), 2.04 - 2.19 (m, 2 H), 2.27 - 2.39 (m, 1 H), 2.54 - 2.65 (m, 1 H), 2.72 - 2.83 (m, 1 H), 3.17 - 3.39 (m, 1 H), 6.75 - 6.86 (m, 1 H), 7.43 (d, 1 H)                                         |
| 2-[(6-Chloro-3-pyridyl)methyl]cyclohexanone ( <b>26e</b> ; yield: 2%; purity 50%).          |    | LCMS (ESIpos): m/z = 224.2 (M+H) <sup>+</sup>                                                                                                                                                                                                                                                                         |
| 2-[(5-Chloro-3-pyridyl)methyl]cyclohexanone ( <b>26f</b> ; yield: 30%, purity 93%).         |  | LCMS (ESIpos): m/z = 223.9, 225.9 (M+H) <sup>+</sup> ; <sup>1</sup> H-NMR (500 MHz, CDCl <sub>3</sub> ) δ [ppm]: 1.38 (qd, 1H), 1.57 – 1.73 (m, 2H), 1.83 – 1.93 (m, 1H), 2.01 – 2.14 (m, 2H), 2.28 – 2.37 (m, 1H), 2.40 – 2.49 (m, 2H), 2.51 – 2.60 (m, 1H), 3.17 (dd, 1H), 7.52 (t, 1H), 8.31 (d, 1H), 8.40 (d, 1H) |
| 2-[(5-Chloro-2-pyridyl)methyl]cyclohexanone ( <b>26h</b> ; Yield: 14%, purity 60%).         |  | <sup>1</sup> H NMR (250 MHz, CDCl <sub>3</sub> ) δ = 1.60 – 1.74 (m, 4H), 1.99 – 2.26 (m, 2H), 2.27 – 2.45 (m, 2H), 2.56 (dd, 1H), 2.89 – 3.05 (m, 1H), 3.28 (dd, J=14.2, 6.5, 1H), 7.17 (d, 1H), 7.54 (dd, 1H), 8.44 (d, 1H)                                                                                         |
| ( <b>26i</b> ; yield: 59%, purity 69%).                                                     |  | <sup>1</sup> H-NMR (500 MHz, CDCl <sub>3</sub> ) δ [ppm]: 1.34 - 1.45 (m, 2H), 1.67 (s, 9H), 1.70 - 1.91 (m, 2H), 2.01 - 2.19 (m, 2H), 2.28 - 2.40 (m, 1H), 2.42 - 2.58 (m, 2H), 2.61 - 2.72 (m, 1H), 3.28 (ddd, 1H), 7.13 - 7.25 (m, 1H), 7.27 - 7.39 (m, 2H), 7.48 (d, 1H), 8.02 - 8.24 (m, 1H)                     |

2-[(5-Chlorothiazol-2-yl)methyl]cyclohexanone (**26d**).

Step A: To vigorously stirred cyclohexanone (2.81 ml, 27.1 mmol) was added aq. NaOH (3.39 ml, 6.78 mmol, 2M) followed by 5-chloro-1,3-thiazole-2-carbaldehyde (1.00g, 6.78 mmol). After 1.5h, the reaction mixture was diluted with water (20 ml) and extracted with EtOAc (2 x 30 ml). The combined

organic layers were dried via a hydrophobic filter and concentrated to dryness under reduced pressure. The crude was purified by chromatography on silica gel (gradient hexane / EtOAc) to give 2-[(5-chlorothiazol-2-yl)-hydroxy-methyl]cyclohexanone (1.11g, 64% yield, 96% purity). LCMS (ESIpos):  $m/z = 245.9, 247.9$  [M+H]<sup>+</sup>.

Step B: To a stirred solution of 2-[(5-chlorothiazol-2-yl)-hydroxy-methyl]cyclohexanone (1.0 g, 4.07 mmol) in 1,4-dioxane (20 ml) was added burgess reagent (1.07 g, 4.48 mmol) and the reaction mixture was heated to reflux. After 1h, the mixture was concentrated under reduced pressure, diluted with aq. sodium carbonate solution (20 ml, 1M) and extracted with EtOAc (2 x 30 ml). The combined organic layers were dried over an hydrophobic filter and concentrated under reduced pressure. The crude was purified by chromatography on silica gel (gradient hexane / EtOAc) to give 2-[(5-chlorothiazol-2-yl)methylene]cyclohexanone (348 mg, 37% yield, 98% purity). LCMS (ESIpos):  $m/z = 227.9, 229.9$  [M+H]<sup>+</sup>.

Step C: Aforementioned 2-[(5-chlorothiazol-2-yl)methylene]cyclohexanone (300 mg, 1.32 mmol) in EtOAc (4 ml) and EtOH (4 ml) was added Pd/C (50 mg, 10%) and the flask was purged with hydrogen. The reaction was stirred for 24h, then filtered over celite and concentrated to dryness under reduced pressure to yield 2-[(5-chlorothiazol-2-yl)methyl]cyclohexanone (316 mg, 99% yield, 99% purity). LCMS (ESIpos):  $m/z = 229.9, 231.9$  [M+H]<sup>+</sup>.

#### *2-(4-pyridylmethyl)cyclohexanone (26g)*

The synthesis of intermediate **26g** was carried out following literature procedure. (J. Galambos *et al.* Bioorg. Med. Chem. Lett. 20 (2010), 4371 – 4375.)
